# Supplementary material
Source: Elsevier journal article supplement (https://pure.mpg.de/pubman/item/item_2388664_6/component/file_2388663/mmc1.pdf)
Supplement: mmc1 [file mmc1.pdf]

## Left-Right Asymmetry of Maturation Rates in Human Embryonic Neural Development

### *Supplemental Information*

#### **Contents**

|                                                                                                                                                                                               |    |
|-----------------------------------------------------------------------------------------------------------------------------------------------------------------------------------------------|----|
| Supplementary Methods.....                                                                                                                                                                    | 2  |
| Tissue collection .....                                                                                                                                                                       | 2  |
| RNA-extraction and sequencing .....                                                                                                                                                           | 2  |
| Bioinformatics & statistics .....                                                                                                                                                             | 3  |
| Supplementary Results.....                                                                                                                                                                    | 4  |
| Gene ontology (GO) enrichment .....                                                                                                                                                           | 4  |
| Transcription factor targets.....                                                                                                                                                             | 4  |
| The asynchrony between left and right spinal cord .....                                                                                                                                       | 5  |
| Comparing spinal cord and hindbrain .....                                                                                                                                                     | 5  |
| Supplementary Tables.....                                                                                                                                                                     | 6  |
| Table S1. Information on samples .....                                                                                                                                                        | 6  |
| Table S2. Gene Ontology gene sets showing lateralization in spinal cord .....                                                                                                                 | 7  |
| Table S3. Gene Ontology gene sets showing lateralization in hindbrain .....                                                                                                                   | 14 |
| Table S4. Transcription factor targets significantly lateralised in spinal cord .....                                                                                                         | 19 |
| Table S5. Transcription factor targets significantly lateralised in hindbrain .....                                                                                                           | 20 |
| Supplementary Figures.....                                                                                                                                                                    | 23 |
| Figure S1. Multidimensional scaling plot based on log <sub>2</sub> (cpm) expression values for genes surviving filtering for all RNASeq libraries, and after all quality control stages. .... | 23 |
| Figure S2. REVIGO (Treemap) clustered map of Gene Ontology terms with more than 2-fold difference between left and right. ....                                                                | 24 |
| Figure S3. REVIGO clustered map of Gene Ontology terms with more than 2-fold difference between left and right in both spinal cord and hindbrain. ....                                        | 25 |
| Figure S4. Estimate of asynchrony between left and right spinal cord.....                                                                                                                     | 26 |
| Figure S5. Comparison of per-gene developmental changes of expression in hindbrain vs spinal cord.....                                                                                        | 27 |
| Figure S6. Comparison of per-gene lateralization t-values for hindbrain vs spinal cord. ....                                                                                                  | 27 |
| Supplementary References .....                                                                                                                                                                | 28 |

## Supplementary Methods

### Tissue collection

Embryos were collected by the MRC-Wellcome Trust Human Developmental Biology Resource <http://www.hdbr.org> (1). The embryos were obtained anonymously from voluntary medical terminations (a combination of mifepristone and misoprostol) following appropriate informed consent by the donors, and with ethical approval from the Newcastle and North Tyneside NHS Health Authority Joint Ethics Committee. Donors to HDBR are asked to give written consent for the embryonic material to be collected, and are only approached once a decision to terminate their pregnancy has been made. Donors' ages ranged from 16 to 30 years old (Supplementary Table S1), and none of the abortions were due to observed congenital malformations or suspected genetic disorders. All karyotypes were normal. The development of the embryos was assessed and designated to the relevant Carnegie stage (CS) (2), using a practical staging guide devised to enable staging to a particular CS and using the external morphology of a single sample (3).

The spinal cords and hindbrains from eighteen embryos, ranging from CS13 to CS23 at the times of the terminations (Supplementary Table S1), were dissected out and separated from each other, after which they were also separated into left and right halves down the midline. Morphological landmarks were used to determine the spinal cord and hindbrain regions. The flexure of the brain and constriction of the neural tube at the isthmus was used to determine the superior limit of the hindbrain (i.e. midbrain/hindbrain junction). To separate hindbrain from spinal cord, the first dorsal root ganglion was used as landmark. The first dorsal root ganglion was not itself included in the tissue that was dissected, but the neural tube directly superior to this was used as the end point of the hindbrain, so that the neural tissue adjacent to the first dorsal root ganglion was included in the spinal cord tissue. The inferior limit of the spinal cord could not be defined in relation to visible external morphological features, but included the cervical and part of the thoracic region.

### RNA-extraction and sequencing

RNA was extracted at HDBR Newcastle. Tissue samples were divided into sub-samples each weighing thirty milligrams. The sub-samples were homogenised using a Precellys 24 bead mill homogeniser (Bertin Corp. Rockville, MD, USA) using ceramic 1.4mm beads for soft tissue homogenising (CK14) with 600µl of RTL plus Buffer with 10µl/ml of β-Mercaptoethanol and 5µl/ml of reagent DX (Qiagen, Venlo, the Netherlands). RNA and DNA was extracted from the tissue with a QIAcube using an AllPrep DNA/RNA Mini Kit (Qiagen) following the manufacturer's recommended protocol. RNA was then pooled from all 30 mg sub-samples belonging to a given embryo's left or right spinal cord, or left or right hindbrain. RNA quality was assessed using an Agilent 2100 Bioanalyzer (Applied Biosystems,

Santa Clara, CA, USA), and then RNA was shipped on dry ice to Beijing Genomics Institute (BGI) Shenzhen/HongKong, China. At BGI, the RNA was treated with DNase and quality determined again on an Agilent 2100 Bioanalyzer. Two within-embryo left-right pairs of samples (i.e. 1x hindbrain, 1x spinal cord) were excluded because of insufficient quality. All other samples passed the quality filters of:  $\geq 4 \mu\text{g}$  RNA; concentration  $\geq 80 \text{ ng}/\mu\text{L}$ ;  $\text{RIN} \geq 7.0$ ;  $28 \text{ S}/18 \text{ S} \geq 1.0$ ; smooth baseline and normal 5S peak.

For library preparation, Illumina TruSeq RNA-kits (Illumina, San Diego, CA, USA) were used according to the manufacturer's instructions. Magnetic beads with Oligo(dT) were used to isolate mRNA from total RNA. Mixed with the fragmentation buffer, the mRNA was fragmented. cDNA was synthesized using the mRNA fragments as templates, with random hexamer primers. Short fragments were purified and resolved with elution buffer for end-reparation and single nucleotide A (adenine) addition. After that, the short fragments were connected with adapters. After agarose gel electrophoresis, fragments were selected for PCR amplification as templates. During the quality control (QC) steps, Agilent 2100 Bioanalyzer and ABI StepOnePlus Real-Time PCR Systems (Applied Biosystems, Foster City, CA, USA) were used for quantification and qualification of the sample library. The library was sequenced using Illumina HiSeq<sup>TM</sup> 2000, yielding paired reads of 90bp.

### **Bioinformatics & statistics**

From each embryo, four libraries were sequenced: left and right spinal cord and left and right hindbrain, except for those failing quality control (Supplementary Table S1), making a total of 68 libraries. Primary sequencing data produced by Illumina HiSeq<sup>TM</sup> 2000, called as raw reads, were subjected to QC to determine if a resequencing step was needed. After QC, raw reads were filtered into clean reads by removing reads with adapters, and reads with  $> 10\%$  unknown bases or  $> 50\%$  bases with quality  $< 10$ . The clean reads were aligned to the reference sequence GRCh37 (hg19) with SOAPaligner/SOAP2 v2.21 (4), using default settings. QC of alignment was performed to determine if resequencing was needed (5). Tophat (v2.08) (6) and Cufflink (v2.0.2) (7, 8) were used to refine alignments. SOAPsnp v1.05 was used to call genotypes of single nucleotide polymorphisms (SNPs) (9), and output files were reformatted for PLINK (10).

To inspect data quality, multidimensional scaling (MDS) analysis was used for the transcriptome-wide SNP data with PLINK 1.07 (10). Another MDS analysis was performed based on normalised and filtered (see below) gene expression level data (Bioconductor, plotMDS function). These QC steps uncovered an earlier tube labelling error, which led us to exclude one sample and its contralateral mate from further analysis. This resulted in data from sixteen embryos for spinal cord, and data from seventeen embryos for hindbrain (Supplementary Table S1). MDS analysis of the

expression data was then performed again, based only on the cleaned dataset (Supplementary Figure S1).

## Supplementary Results

### Gene Ontology (GO) enrichment

In the right spinal cord we observed enrichment for 129 GO-terms, and in the left spinal cord for 18 GO-terms (family-wise error rate (FWER) < 0.05) (Supplementary Table S2). In the hindbrain the numbers were 112 on the left and 17 on the right (Supplementary Table S3). GO-term clustering highlighted 'glutamate receptor signalling pathway' and 'neurotransmitter transport' for the left spinal cord, and processes related to the cell cycle, transcription and translation for the right spinal cord (Supplementary Figure S2). In hindbrain, GO-term clustering highlighted the process 'DNA-dependent DNA replication' on the left side and diverse processes on the right side (Supplementary Figure S2).

Fifty-one significantly upregulated GO-terms were shared between right spinal cord and left hindbrain. Examples are shown Figure 2 in the main text. Two terms were shared between left spinal cord and right hindbrain. None were shared between ipsilateral sides of spinal cord and hindbrain. For the shared GO-terms for left spinal cord and right hindbrain, the clustering highlighted 'synaptic transmission', 'neuron maturation' and 'developmental cell growth'. For right spinal cord and left hindbrain, cell cycle and RNA processing terms were clustered, as well as chromosome segregation terms (Supplementary Figure S3).

### Transcription factor targets

The gene-sets in the MSigDB-collection 'transcription factor targets' v5.0 represent genes with particular motifs within 2 kb of their transcription start sites. Not all motifs match known transcription factors (TFs), while some motifs match multiple TFs, and some TFs bind multiple motifs. In the spinal cord, genes with motifs targeted by NRSF (also known as REST) were strongly upregulated in the left side of the tissue (FWER < 0.0005) (Supplementary Table S4). Also upregulated in the left spinal cord were targets for *SF1* and *TCF3* (E47) (Supplementary Table S4). *NRSF* encodes a transcriptional repressor that represses neuronal genes in non-neuronal tissues (11). *SF1* encodes a nuclear pre-mRNA splicing factor, and is involved in sex determination (12); the encoded protein of *TCF3* is required for B and T lymphocyte development, but also plays a role in other processes such as cell differentiation (13, 14). In the right spinal cord we observed upregulation of targets for *E2F1* (Fig

2, Supplementary Table S4) and *TFDP1*. The complete list for the spinal cord can be found in Supplementary Table S4.

In the left hindbrain, 27 sets of genes located near particular motifs were upregulated, whereas only one set was upregulated in the right hindbrain (Supplementary Table S5). The motifs on the left matched *E2F1*, *E2F4*, *TFDP1*, *TFDP2*, *RB1*, *YY1* (Figure 3, Supplementary Table S5). *E2F1* can mediate both cell proliferation and p53-dependent/independent apoptosis (15, 16); *E2F4* plays an important role in the suppression of proliferation-associated genes. It helps *E2F1* to associate with *RB1* (17); *TFDP1* and *TFDP2* dimerize with E2F transcription factors, resulting in transcriptional activation of cell cycle regulated genes (18); *RB1* is a negative regulator of the cell cycle, which interacts with *E2F* factors. It is also required for cells to resist G1 to S transition (phases of the cell cycle) in response to un-programmed proliferative signals (19); *YY1* acts both as a repressor and an activator at various promoters, and is a negative regulator of p53 (20, 21). Two of the gene sets having motifs for *E2F1/TFDP1* were also significantly enriched in right spinal cord, as mentioned above.

### **The asynchrony between left and right spinal cord**

For all genes within the most left-lateralised GO-term (GO:0007269 (Neurotransmitter\_secretion (5)), and separately for the most right-lateralised GO-term GO:0006261 (DNA\_Dependent\_DNA\_Replication (7)), we calculated the median expression level per RNA-seq library, and then fitted a line of median expression vs Carnegie stage for the left and the right libraries separately, using either linear regression or allowing a quadratic term for Carnegie stage. In this approach, the distance between the left and the right line is an indicator of the developmental left-right asynchrony. As can be seen in Supplementary Figure S4 A-D, the size of the asynchrony varies by stage because the left and right lines are not parallel. Averaging over all of this analysis, the right-side delay is roughly 0.4 Carnegie stages, but the overall subtlety of lateralization as measured in 18 embryos makes it difficult to put one single and concrete value on the asynchrony.

### **Comparing spinal cord and hindbrain**

Regarding developmental changes of gene expression over Carnegie stages, most genes behaved fairly similarly in hindbrain and spinal cord (Supplementary Figure S5), with a correlation of  $r=0.95$  between the two tissues for their linear slopes of per-gene developmental changes in expression. However, for per-gene lateralization, the similarity between spinal cord and hindbrain was much weaker, as can be seen in Supplementary Figure S6,  $r=-0.26$  for the per-gene left/right t-values in the two tissues. Yet, at the gene-set level, strongly lateralised sets in spinal cord also showed similar, but mirrored, patterns in hindbrain, as shown in Figures 2 and 3 and Supplementary Figures S2 and S3.

## Supplementary Tables

**Table S1. Information on samples**

| Embryo #     | Carnegie Stage | Karyotype | Age of donor (years) | Batch | Time until freezing (min) | Note             |
|--------------|----------------|-----------|----------------------|-------|---------------------------|------------------|
| <b>11903</b> | CS13           | 46, XX    | 20                   | 1     | 315                       |                  |
| <b>11993</b> | CS13           | 46, XY    | 26                   | 2     | 150                       |                  |
| <b>12301</b> | CS15           | 46, XY    | 19                   | 2     | 240                       |                  |
| <b>11898</b> | CS16           | 46, XY    | 23                   | 3     | 120                       |                  |
| <b>11962</b> | CS17           | 46, XX    | 24                   | 1     | 225                       | spinal cord only |
| <b>11978</b> | CS17           | 46, XX    | 20                   | 1     | 150                       |                  |
| <b>12341</b> | CS17           | 46, XY    | 30                   | 3     | 240                       |                  |
| <b>11905</b> | CS18           | 46, XY    | 20                   | 1     | 300                       | hindbrain only   |
| <b>12254</b> | CS19           | 46, XY    | 19                   | 2     | 120                       |                  |
| <b>12292</b> | CS20           | 46, XX    | 21                   | 2     | 120                       |                  |
| <b>12347</b> | CS21           | 46, XX    | 22                   | 3     | 600                       |                  |
| <b>11954</b> | CS22           | 46, XY    | 20                   | 1     | 230                       | hindbrain only   |
| <b>11963</b> | CS22           | 46, XX    | 23                   | 1     | 60                        |                  |
| <b>12307</b> | CS22           | 46, XY    | 17                   | 3     | 120                       |                  |
| <b>12232</b> | CS23           | 46, XX    | 28                   | 2     | 105                       |                  |
| <b>12285</b> | CS23           | 46, XY    | 23                   | 2     | 180                       |                  |
| <b>11985</b> | CS23           | 46, XY    | Unknown              | 3     | 120                       |                  |
| <b>12255</b> | CS23           | 46, XY    | 16                   | 3     | 135                       |                  |

**Table S2. Gene Ontology gene sets showing lateralization in spinal cord**

| GO description                                                                                                | GO number  | # genes | NES <sup>a</sup> | FWER <sup>b</sup><br>p | Result in<br>hindbrain <sup>c</sup> |
|---------------------------------------------------------------------------------------------------------------|------------|---------|------------------|------------------------|-------------------------------------|
| Up on left side:                                                                                              |            |         |                  |                        |                                     |
| NEUROTRANSMITTER_SECRETION (5)                                                                                | GO:0007269 | 66      | -2.83            | 0                      |                                     |
| NEUROTRANSMITTER_TRANSPORT (4)                                                                                | GO:0006836 | 77      | -2.80            | 0                      |                                     |
| REGULATION_OF_NEUROTRANSMITTER_LEVELS (4)                                                                     | GO:0001505 | 86      | -2.71            | 0                      |                                     |
| GLUTAMATE_RECEPTOR_SIGNALING_PATHWAY (6)                                                                      | GO:0007215 | 47      | -2.70            | 0                      |                                     |
| SYNAPTIC_TRANSMISSION (3)                                                                                     | GO:0007268 | 385     | -2.65            | 0                      | +                                   |
| REGULATION_OF_SYNAPTIC_TRANSMISSION (3)                                                                       | GO:0050804 | 89      | -2.56            | 0                      | +                                   |
| REGULATION_OF_ALPHA_AMINO_3_HYDROXY_5_METHYL_4_ISOXAZOLE_PROPIONATE_SELECTIVE_GLUTAMATE_RECEPTOR_ACTIVITY (5) | GO:2000311 | 17      | -2.37            | 0.004                  |                                     |
| MEMBRANE_DEPOLARIZATION (5)                                                                                   | GO:0051899 | 63      | -2.35            | 0.004                  |                                     |
| ADULT_BEHAVIOR (4)                                                                                            | GO:0030534 | 27      | -2.34            | 0.004                  |                                     |
| SIGNAL_RELEASE (5)                                                                                            | GO:0023061 | 176     | -2.33            | 0.004                  |                                     |
| GLUTAMATE_SECRETION (5)                                                                                       | GO:0014047 | 21      | -2.31            | 0.006                  |                                     |
| DENDRITE_MORPHOGENESIS (5)                                                                                    | GO:0048813 | 56      | -2.30            | 0.007                  |                                     |
| REGULATION_OF_GLUTAMATE_RECEPTOR_SIGNALING_PATHWAY (5)                                                        | GO:1900449 | 21      | -2.30            | 0.007                  |                                     |
| LEARNING (5)                                                                                                  | GO:0007612 | 29      | -2.23            | 0.018                  |                                     |
| DICARBOXYLIC_ACID_TRANSPORT (6)                                                                               | GO:0006835 | 38      | -2.23            | 0.019                  |                                     |
| NEURON_NEURON_SYNAPTIC_TRANSMISSION (4)                                                                       | GO:0007270 | 37      | -2.19            | 0.038                  |                                     |
| CENTRAL_NERVOUS_SYSTEM_NEURON_DIFFERENTIATION (6)                                                             | GO:0021953 | 47      | -2.17            | 0.047                  |                                     |
| POTASSIUM_ION_TRANSPORT (7)                                                                                   | GO:0006813 | 90      | -2.16            | 0.049                  |                                     |
| Up on right side:                                                                                             |            |         |                  |                        |                                     |
| COTRANSLATIONAL_PROTEIN_TARGETING_TO_MEMBRANE (6)                                                             | GO:0006613 | 107     | 3.32             | 0                      |                                     |
| SRP_DEPENDENT_COTRANSLATIONAL_PROTEIN_TARGETING_TO_MEMBRANE (6)                                               | GO:0006614 | 106     | 3.30             | 0                      |                                     |
| PROTEIN_TARGETING_TO_ER (5)                                                                                   | GO:0045047 | 109     | 3.29             | 0                      |                                     |
| ESTABLISHMENT_OF_PROTEIN_LOCALIZATION_TO_ENDOPLASMIC_RETICULUM (6)                                            | GO:0072599 | 113     | 3.21             | 0                      |                                     |
| PROTEIN_LOCALIZATION_TO_ENDOPLASMIC_RETICULUM (7)                                                             | GO:0070972 | 124     | 3.11             | 0                      |                                     |
| TRANSLATIONAL_TERMINATION (7)                                                                                 | GO:0006415 | 171     | 3.01             | 0                      |                                     |

| GO description                                                                                         | GO number  | # genes | NES <sup>a</sup> | FWER <sup>b</sup><br>p | Result in<br>hindbrain <sup>c</sup> |
|--------------------------------------------------------------------------------------------------------|------------|---------|------------------|------------------------|-------------------------------------|
| NUCLEAR_TRANSCRIBED_MRNA_CATABOLIC_PROCESS_NONSENSE_MEDIATED_DECAY (9)                                 | GO:0000184 | 114     | 3.00             | 0                      |                                     |
| TRANSLATIONAL_ELONGATION (6)                                                                           | GO:0006414 | 176     | 2.95             | 0                      |                                     |
| TRANSLATIONAL_INITIATION (4)                                                                           | GO:0006413 | 234     | 2.95             | 0                      |                                     |
| NUCLEAR_TRANSCRIBED_MRNA_CATABOLIC_PROCESS (8)                                                         | GO:0000956 | 178     | 2.78             | 0                      |                                     |
| PROTEIN_TARGETING_TO_MEMBRANE (5)                                                                      | GO:0006612 | 151     | 2.76             | 0                      |                                     |
| MRNA_CATABOLIC_PROCESS (7)                                                                             | GO:0006402 | 188     | 2.71             | 0                      |                                     |
| RNA_CATABOLIC_PROCESS (6)                                                                              | GO:0006401 | 206     | 2.70             | 0                      |                                     |
| TRANSLATION (6)                                                                                        | GO:0006412 | 412     | 2.68             | 0                      |                                     |
| VIRAL_TRANSCRIPTION (5)                                                                                | GO:0019083 | 177     | 2.68             | 0                      | -                                   |
| CELLULAR_PROTEIN_COMPLEX_DISASSEMBLY (7)                                                               | GO:0043624 | 215     | 2.67             | 0                      |                                     |
| MULTI_ORGANISM_METABOLIC_PROCESS (3)                                                                   | GO:0044033 | 188     | 2.65             | 0                      |                                     |
| PROTEIN_COMPLEX_DISASSEMBLY (6)                                                                        | GO:0043241 | 233     | 2.63             | 0                      |                                     |
| ANAPHASE_PROMOTING_COMPLEX_DEPENDENT_PROTEASOMAL_UBIQUITIN_DEPENDENT_PROTEIN_CATABOLIC_PROCESS (8)     | GO:0031145 | 105     | 2.62             | 0                      | -                                   |
| MACROMOLECULAR_COMPLEX_DISASSEMBLY (5)                                                                 | GO:0032984 | 243     | 2.62             | 0                      |                                     |
| VIRAL_GENE_EXPRESSION (4)                                                                              | GO:0019080 | 187     | 2.61             | 0                      |                                     |
| RRNA_PROCESSING (6)                                                                                    | GO:0006364 | 51      | 2.60             | 0                      |                                     |
| MULTI_ORGANISM_CELLULAR_PROCESS (3)                                                                    | GO:0044764 | 434     | 2.60             | 0                      |                                     |
| VIRAL_PROCESS (4)                                                                                      | GO:0016032 | 425     | 2.59             | 0                      |                                     |
| MRNA_METABOLIC_PROCESS (6)                                                                             | GO:0016071 | 422     | 2.58             | 0                      | -                                   |
| VIRAL_LIFE_CYCLE (5)                                                                                   | GO:0019058 | 309     | 2.58             | 0                      |                                     |
| RRNA_METABOLIC_PROCESS (7)                                                                             | GO:0016072 | 54      | 2.57             | 0                      |                                     |
| INTERSPECIES_INTERACTION_BETWEEN_ORGANISMS (3)&SYMBIOSIS_ENCOMPASSING_MUTUALISM_THROUGH_PARASITISM (4) | GO:0044419 | 453     | 2.56             | 0                      |                                     |
| AROMATIC_COMPOUND_CATABOLIC_PROCESS (5)                                                                | GO:0019439 | 337     | 2.50             | 0                      |                                     |
| REGULATION_OF_UBIQUITIN_PROTEIN_LIGASE_ACTIVITY_INVOLVED_IN_MITOTIC_CELL_CYCLE (5)                     | GO:0051439 | 74      | 2.49             | 0                      |                                     |
| ORGANIC_CYCLIC_COMPOUND_CATABOLIC_PROCESS (5)                                                          | GO:1901361 | 349     | 2.48             | 0                      |                                     |



| GO description                                                                                                       | GO number  | # genes | NES <sup>a</sup> | FWER <sup>b</sup><br>p | Result in<br>hindbrain <sup>c</sup> |
|----------------------------------------------------------------------------------------------------------------------|------------|---------|------------------|------------------------|-------------------------------------|
| NUCLEOBASE_CONTAINING_COMPOUND_CATABOLIC_PROCESS (5)                                                                 | GO:0034655 | 318     | 2.47             | 0                      |                                     |
| HETEROCYCLE_CATABOLIC_PROCESS (5)                                                                                    | GO:0046700 | 335     | 2.47             | 0                      |                                     |
| POSITIVE_REGULATION_OF_UBIQUITIN_PROTEIN_LIGASE_ACTIVITY_INVOLVED_IN_REGULATION_OF_MITOTIC_CELL_CYCLE_TRANSITION (7) | GO:0051437 | 68      | 2.46             | 0                      |                                     |
| NEGATIVE_REGULATION_OF_LIGASE_ACTIVITY (5)&NEGATIVE_REGULATION_OF_UBIQUITIN_PROTEIN_TRANSFERASE_ACTIVITY (6)         | GO:0051352 | 70      | 2.45             | 0                      |                                     |
| CELLULAR_NITROGEN_COMPOUND_CATABOLIC_PROCESS (5)                                                                     | GO:0044270 | 335     | 2.45             | 0                      |                                     |
| CHROMOSOME_SEGREGATION (4)                                                                                           | GO:0007059 | 166     | 2.44             | 0                      | -                                   |
| ESTABLISHMENT_OF_PROTEIN_LOCALIZATION_TO_MEMBRANE (5)                                                                | GO:0090150 | 262     | 2.42             | 0                      |                                     |
| DNA_STRAND_ELONGATION (6)                                                                                            | GO:0022616 | 35      | 2.41             | 0                      | -                                   |
| DNA_STRAND_ELONGATION_INVOLVED_IN_DNA_REPLICATION (7)                                                                | GO:0006271 | 32      | 2.41             | 0                      | -                                   |
| MITOCHONDRIAL_TRANSLATIONAL_INITIATION (5)                                                                           | GO:0070124 | 84      | 2.41             | 0                      |                                     |
| NEGATIVE_REGULATION_OF_UBIQUITIN_PROTEIN_LIGASE_ACTIVITY_INVOLVED_IN_MITOTIC_CELL_CYCLE (6)                          | GO:0051436 | 65      | 2.40             | 0                      | -                                   |
| RIBOSOME_BIOGENESIS (5)                                                                                              | GO:0042254 | 68      | 2.40             | 0                      |                                     |
| MITOTIC_CELL_CYCLE_CHECKPOINT (6)                                                                                    | GO:0007093 | 141     | 2.39             | 0                      | -                                   |
| MITOTIC_SISTER_CHROMATID_SEGREGATION (6)                                                                             | GO:0000070 | 101     | 2.38             | 0                      | -                                   |
| ANTIGEN_PROCESSING_AND_PRESENTATION_OF_PEPTIDE_ANTIGEN_VIA_MHC_CLASS_I (5)                                           | GO:0002474 | 79      | 2.38             | 0                      |                                     |
| REGULATION_OF_CHROMOSOME_SEGREGATION (4)                                                                             | GO:0051983 | 65      | 2.38             | 0                      | -                                   |
| REGULATION_OF_PROTEIN_UBIQUITINATION_INVOLVED_IN_UBIQUITIN_DEPENDENT_PROTEIN_CATABOLIC_PROCESS (8)                   | GO:2000058 | 80      | 2.36             | 0                      |                                     |
| NEGATIVE_REGULATION_OF_MITOTIC_CELL_CYCLE_PHASE_TRANSITION (6)                                                       | GO:1901991 | 127     | 2.36             | 0                      | -                                   |
| ANTIGEN_PROCESSING_AND_PRESENTATION_OF_EXOGENOUS_PEPTIDE_ANTIGEN_VIA_MHC_CLASS_I (6)                                 | GO:0042590 | 63      | 2.36             | 0                      |                                     |
| SISTER_CHROMATID_SEGREGATION (5)                                                                                     | GO:0000819 | 102     | 2.35             | 0                      | -                                   |

| GO description                                                                                                         | GO number  | # genes | NES <sup>a</sup> | FWER <sup>b</sup><br>p | Result in<br>hindbrain <sup>c</sup> |
|------------------------------------------------------------------------------------------------------------------------|------------|---------|------------------|------------------------|-------------------------------------|
| MITOCHONDRIAL_TRANSLATIONAL_ELONGATION (6)                                                                             | GO:0070125 | 84      | 2.35             | 0                      |                                     |
| POSITIVE_REGULATION_OF_PROTEIN_UBIQUITINATION_INVOLVED_IN_UBIQUITIN_DEPENDENT_PROTEIN_CATABOLIC_PROCESS (8)            | GO:2000060 | 75      | 2.35             | 0                      |                                     |
| MITOCHONDRIAL_TRANSLATIONAL_TERMINATION (6)                                                                            | GO:0070126 | 84      | 2.34             | 0                      |                                     |
| CELL_CYCLE_CHECKPOINT (5)                                                                                              | GO:0000075 | 199     | 2.34             | 0                      | -                                   |
| NEGATIVE_REGULATION_OF_CELL_CYCLE_PHASE_TRANSITION (5)                                                                 | GO:1901988 | 133     | 2.34             | 0                      | -                                   |
| NUCLEAR_TRANSCRIBED_MRNA_CATABOLIC_PROCESS_EXONUCLEOLYTIC (9)                                                          | GO:0000291 | 30      | 2.34             | 0                      |                                     |
| ANTIGEN_PROCESSING_AND_PRESENTATION_OF_EXOGENOUS_PEPTIDE_ANTIGEN_VIA_MHC_CLASS_I_TAP_DEPENDENT (7)                     | GO:0002479 | 62      | 2.33             | 0                      |                                     |
| RIBONUCLEOPROTEIN_COMPLEX_BIOGENESIS (4)                                                                               | GO:0022613 | 161     | 2.32             | 0                      |                                     |
| NEGATIVE_REGULATION_OF_MITOTIC_CELL_CYCLE (5)                                                                          | GO:0045930 | 174     | 2.32             | 0                      | -                                   |
| POSITIVE_REGULATION_OF_UBIQUITIN_PROTEIN_TRANSFERASE_ACTIVITY (6)                                                      | GO:0051443 | 81      | 2.32             | 0                      |                                     |
| POSITIVE_REGULATION_OF_LIGASE_ACTIVITY (5)                                                                             | GO:0051351 | 83      | 2.31             | 0                      |                                     |
| MITOCHONDRIAL_TRANSLATION (5)                                                                                          | GO:0032543 | 106     | 2.30             | 0                      |                                     |
| SIGNAL_TRANSDUCTION_INVOLVED_IN_DNA_INTEGRITY_CHECKPOINT (6)&SIGNAL_TRANSDUCTION_INVOLVED_IN_DNA_DAMAGE_CHECKPOINT (7) | GO:0072401 | 65      | 2.30             | 0                      | -                                   |
| MITOTIC_DNA_DAMAGE_CHECKPOINT (7)                                                                                      | GO:0044773 | 80      | 2.30             | 0                      | -                                   |
| ESTABLISHMENT_OF_PROTEIN_LOCALIZATION_TO_ORGANELLE (5)                                                                 | GO:0072594 | 406     | 2.30             | 0                      |                                     |
| G1_DNA_DAMAGE_CHECKPOINT (7)                                                                                           | GO:0044783 | 68      | 2.30             | 0                      |                                     |
| DNA_DEPENDENT_DNA_REPLICATION (7)                                                                                      | GO:0006261 | 88      | 2.29             | 0                      | -                                   |
| EXONUCLEOLYTIC_NUCLEAR_TRANSCRIBED_MRNA_CATABOLIC_PROCESS_INVOLVED_IN_DEADENYLATION_DEPENDENT_DECAY (10)               | GO:0043928 | 29      | 2.29             | 0                      |                                     |
| DNA_REPLICATION (6)                                                                                                    | GO:0006260 | 188     | 2.29             | 0                      | -                                   |
| SPINDLE_ORGANIZATION (5)                                                                                               | GO:0007051 | 77      | 2.28             | 0                      | -                                   |
| MITOTIC_DNA_INTEGRITY_CHECKPOINT (7)                                                                                   | GO:0044774 | 84      | 2.28             | 0                      | -                                   |

| <b>GO description</b>                                                                                                                                                                                    | <b>GO number</b> | <b># genes</b> | <b>NES<sup>a</sup></b> | <b>FWER<sup>b</sup><br/>p</b> | <b>Result in<br/>hindbrain<sup>c</sup></b> |
|----------------------------------------------------------------------------------------------------------------------------------------------------------------------------------------------------------|------------------|----------------|------------------------|-------------------------------|--------------------------------------------|
| MRNA_SPLICING_VIA_SPLICEOSOME (8)&RNA_SPLICING_VIA_TRANSESTERIFICATION_REACTIONS_WITH_BULGED_ADENOSINE_AS_NUCLEOPHILE (9)                                                                                | GO:0000398       | 187            | 2.28                   | 0                             | -                                          |
| INTRACELLULAR_SIGNAL_TRANSDUCTION_INVOLVED_IN_G1_DNA_DAMAGE_CHECKPOINT (7)&SIGNAL_TRANSDUCTION_INVOLVED_IN_MITOTIC_G1_DNA_DAMAGE_CHECKPOINT (8)                                                          | GO:1902400       | 61             | 2.28                   | 0                             |                                            |
| MITOTIC_SPINDLE_ORGANIZATION (6)                                                                                                                                                                         | GO:0007052       | 46             | 2.28                   | 0                             | -                                          |
| SIGNAL_TRANSDUCTION_INVOLVED_IN_MITOTIC_CELL_CYCLE_CHECKPOINT (6)&SIGNAL_TRANSDUCTION_INVOLVED_IN_MITOTIC_DNA_INTEGRITY_CHECKPOINT (7)&SIGNAL_TRANSDUCTION_INVOLVED_IN_MITOTIC_DNA_DAMAGE_CHECKPOINT (8) | GO:0072413       | 63             | 2.27                   | 0                             | -                                          |
| MITOTIC_G1_DNA_DAMAGE_CHECKPOINT (8)                                                                                                                                                                     | GO:0031571       | 67             | 2.27                   | 0                             |                                            |
| RNA_SPLICING_VIA_TRANSESTERIFICATION_REACTIONS (8)                                                                                                                                                       | GO:0000375       | 191            | 2.27                   | 0.001                         | -                                          |
| SIGNAL_TRANSDUCTION_INVOLVED_IN_CELL_CYCLE_CHECKPOINT (5)                                                                                                                                                | GO:0072395       | 66             | 2.27                   | 0.001                         | -                                          |
| MUSCLE_FILAMENT_SLIDING (7)&ACTIN_MYOSIN_FILAMENT_SLIDING (7)                                                                                                                                            | GO:0030049       | 30             | 2.27                   | 0.001                         |                                            |
| MICROTUBULE_CYTOSKELETON_ORGANIZATION_INVOLVED_IN_MITOSIS (5)                                                                                                                                            | GO:1902850       | 28             | 2.26                   | 0.001                         | -                                          |
| MITOTIC_G1_S_TRANSITION_CHECKPOINT (7)                                                                                                                                                                   | GO:0044819       | 68             | 2.26                   | 0.001                         |                                            |
| SIGNAL_TRANSDUCTION_IN_RESPONSE_TO_DNA_DAMAGE (6)                                                                                                                                                        | GO:0042770       | 108            | 2.25                   | 0.001                         | -                                          |
| DNA_DAMAGE_RESPONSE_SIGNAL_TRANSDUCTION_BY_P53_CLASS_MEDIATOR_RESULTING_IN_CELL_CYCLE_ARREST (6)                                                                                                         | GO:0006977       | 60             | 2.25                   | 0.001                         | -                                          |
| REGULATION_OF_LIGASE_ACTIVITY (5)                                                                                                                                                                        | GO:0051340       | 98             | 2.25                   | 0.001                         |                                            |
| REGULATION_OF_UBIQUITIN_PROTEIN_TRANSFERASE_ACTIVITY (6)                                                                                                                                                 | GO:0051438       | 95             | 2.24                   | 0.001                         |                                            |
| CELLULAR_RESPIRATION (5)                                                                                                                                                                                 | GO:0045333       | 128            | 2.24                   | 0.001                         |                                            |
| METAPHASE_PLATE_CONGRESSION (5)                                                                                                                                                                          | GO:0051310       | 35             | 2.24                   | 0.002                         | -                                          |
| REGULATION_OF_CELL_CYCLE_PHASE_TRANSITION (6)                                                                                                                                                            | GO:1901987       | 175            | 2.24                   | 0.002                         | -                                          |

| <b>GO description</b>                                                        | <b>GO number</b> | <b># genes</b> | <b>NES<sup>a</sup></b> | <b>FWER<sup>b</sup><br/>p</b> | <b>Result in<br/>hindbrain<sup>c</sup></b> |
|------------------------------------------------------------------------------|------------------|----------------|------------------------|-------------------------------|--------------------------------------------|
| ELECTRON_TRANSPORT_CHAIN (4)&RESPIRATORY_ELECTRON_TRANSPORT_CHAIN (5)        | GO:0022900       | 92             | 2.23                   | 0.002                         |                                            |
| REGULATION_OF_MITOTIC_CELL_CYCLE_PHASE_TRANSITION (6)                        | GO:1901990       | 164            | 2.23                   | 0.002                         | -                                          |
| G1_S_TRANSITION_OF_MITOTIC_CELL_CYCLE (7)                                    | GO:0000082       | 186            | 2.23                   | 0.002                         | -                                          |
| DNA_DAMAGE_RESPONSE_SIGNAL_TRANSDUCTION_BY_P53_CLASS_MEDIATOR (7)            | GO:0030330       | 93             | 2.22                   | 0.003                         | -                                          |
| CHROMOSOME_LOCALIZATION (5)                                                  | GO:0050000       | 38             | 2.22                   | 0.003                         | -                                          |
| ESTABLISHMENT_OF_CHROMOSOME_LOCALIZATION (5)                                 | GO:0051303       | 38             | 2.21                   | 0.003                         | -                                          |
| CELL_CYCLE_G1_S_PHASE_TRANSITION (6)                                         | GO:0044843       | 191            | 2.21                   | 0.003                         | -                                          |
| DNA_INTEGRITY_CHECKPOINT (6)                                                 | GO:0031570       | 132            | 2.21                   | 0.004                         | -                                          |
| NEGATIVE_REGULATION_OF_CELL_CYCLE_PROCESS (4)                                | GO:0010948       | 174            | 2.20                   | 0.005                         | -                                          |
| RNA_SPLICING (7)                                                             | GO:0008380       | 242            | 2.20                   | 0.007                         | -                                          |
| REGULATION_OF_PROTEOLYSIS_INVOLVED_IN_CELLULAR_PROTEIN_CATABOLIC_PROCESS (7) | GO:1903050       | 179            | 2.20                   | 0.01                          |                                            |
| ATTACHMENT_OF_SPINDLE_MICROTUBULES_TO_KINETOCHORE (5)                        | GO:0008608       | 21             | 2.19                   | 0.01                          | -                                          |
| POSITIVE_REGULATION_OF_PROTEIN_UBIQUITINATION (8)                            | GO:0031398       | 126            | 2.19                   | 0.013                         |                                            |
| PROTEIN_TARGETING (5)                                                        | GO:0006605       | 412            | 2.18                   | 0.02                          |                                            |
| REGULATION_OF_CELLULAR_PROTEIN_CATABOLIC_PROCESS (6)                         | GO:1903362       | 187            | 2.18                   | 0.02                          |                                            |
| MITOTIC_SPINDLE_ASSEMBLY (6)                                                 | GO:0090307       | 24             | 2.17                   | 0.02                          | -                                          |
| DNA_DAMAGE_CHECKPOINT (6)                                                    | GO:0000077       | 125            | 2.17                   | 0.021                         | -                                          |
| PROTEIN_LOCALIZATION_TO_MEMBRANE (4)                                         | GO:0072657       | 327            | 2.16                   | 0.022                         | -                                          |
| MITOTIC_SISTER_CHROMATID_SEPARATION (6)                                      | GO:0051306       | 50             | 2.16                   | 0.022                         |                                            |
| POSITIVE_REGULATION_OF_CELL_CYCLE_ARREST (5)                                 | GO:0071158       | 75             | 2.16                   | 0.022                         |                                            |
| POSITIVE_REGULATION_OF_PROTEOLYSIS (6)                                       | GO:0045862       | 219            | 2.16                   | 0.022                         |                                            |
| MITOTIC_NUCLEAR_DIVISION (5)                                                 | GO:0007067       | 184            | 2.16                   | 0.024                         | -                                          |
| NEGATIVE_REGULATION_OF_PROTEIN_UBIQUITINATION (8)                            | GO:0031397       | 103            | 2.15                   | 0.025                         |                                            |
| MITOTIC_METAPHASE_PLATE_CONGRESSION (4)                                      | GO:0007080       | 30             | 2.15                   | 0.025                         | -                                          |

| GO description                                                                                        | GO number  | # genes | NES <sup>a</sup> | FWER <sup>b</sup><br>p | Result in<br>hindbrain <sup>c</sup> |
|-------------------------------------------------------------------------------------------------------|------------|---------|------------------|------------------------|-------------------------------------|
| POSITIVE_REGULATION_OF_PROTEOLYSIS_INVOLVED_IN_CELLULAR_PROTEIN_CATABOLIC_PROCESS (7)                 | GO:1903052 | 117     | 2.14             | 0.03                   |                                     |
| NEGATIVE_REGULATION_OF_G1_S_TRANSITION_OF_MITOTIC_CELL_CYCLE (7)                                      | GO:2000134 | 82      | 2.14             | 0.03                   |                                     |
| PROTEIN_UBIQUITINATION_INVOLVED_IN_UBIQUITIN_DEPENDENT_PROTEIN_CATABOLIC_PROCESS (9)                  | GO:0042787 | 112     | 2.14             | 0.031                  |                                     |
| CENTROMERE_COMPLEX_ASSEMBLY (5)                                                                       | GO:0034508 | 35      | 2.14             | 0.033                  | -                                   |
| POSITIVE_REGULATION_OF_CELLULAR_PROTEIN_CATABOLIC_PROCESS (6)                                         | GO:1903364 | 120     | 2.13             | 0.038                  |                                     |
| CENP_A_CONTAINING_CHROMATIN_ORGANIZATION (5)&CENP_A_CONTAINING_NUCLEOSOME_ASSEMBLY (6)                | GO:0061641 | 28      | 2.13             | 0.039                  | -                                   |
| NEGATIVE_REGULATION_OF_PROTEIN_MODIFICATION_BY_SMALL_PROTEIN_CONJUGATION_OR_REMOVAL (7)               | GO:1903321 | 107     | 2.13             | 0.039                  |                                     |
| METAPHASE_ANAPHASE_TRANSITION_OF_CELL_CYCLE (6)&REGULATION_OF_MITOTIC_SISTER_CHROMATID_SEPARATION (7) | GO:0044784 | 49      | 2.13             | 0.039                  |                                     |
| POSITIVE_REGULATION_OF_PROTEIN_MODIFICATION_BY_SMALL_PROTEIN_CONJUGATION_OR_REMOVAL (7)               | GO:1903322 | 135     | 2.13             | 0.044                  |                                     |
| REGULATION_OF_METAPHASE_ANAPHASE_TRANSITION_OF_CELL_CYCLE (7)                                         | GO:1902099 | 48      | 2.12             | 0.045                  |                                     |
| CHROMATIN_REMODELING_AT_CENTROMERE (7)                                                                | GO:0031055 | 30      | 2.12             | 0.046                  | -                                   |
| REGULATION_OF_PROTEIN_CATABOLIC_PROCESS (5)                                                           | GO:0042176 | 243     | 2.12             | 0.046                  |                                     |
| METAPHASE_ANAPHASE_TRANSITION_OF_MITOTIC_CELL_CYCLE (5)                                               | GO:0007091 | 49      | 2.12             | 0.047                  |                                     |
| MITOTIC_CELL_CYCLE_PHASE_TRANSITION (6)                                                               | GO:0044772 | 355     | 2.12             | 0.049                  | -                                   |
| CELL_CYCLE_PHASE_TRANSITION (5)                                                                       | GO:0044770 | 368     | 2.12             | 0.049                  | -                                   |
| OSTEOBLAST_DIFFERENTIATION (5)                                                                        | GO:0001649 | 105     | 2.11             | 0.05                   |                                     |

<sup>a</sup> NES = normalised enrichment score; positive = upregulated on the right; negative = upregulated on the left.

<sup>b</sup> FWER = familywise error rate. Included in the table are terms with FWER ≤ 0.05.

<sup>c</sup> + = GO-term is also significantly enriched in right hindbrain; - = GO-term is also significantly enriched in left hindbrain.

**Table S3. Gene Ontology gene sets showing lateralization in hindbrain**

| GO description                                                                                                            | GO number  | # genes | NES <sup>a</sup> | FWER <sup>b</sup> p |
|---------------------------------------------------------------------------------------------------------------------------|------------|---------|------------------|---------------------|
| Up on left side:                                                                                                          |            |         |                  |                     |
| DNA_DEPENDENT_DNA_REPLICATION (7)                                                                                         | GO:0006261 | 88      | -2.74            | 0                   |
| DNA_STRAND_ELONGATION_INVOLVED_IN_DNA_REPLICATION (7)                                                                     | GO:0006271 | 32      | -2.73            | 0                   |
| MRNA_PROCESSING (7)                                                                                                       | GO:0006397 | 276     | -2.73            | 0                   |
| RNA_PROCESSING (6)                                                                                                        | GO:0006396 | 378     | -2.69            | 0                   |
| DNA_STRAND_ELONGATION (6)                                                                                                 | GO:0022616 | 35      | -2.68            | 0                   |
| CELL_CYCLE_DNA_REPLICATION (5)                                                                                            | GO:0044786 | 39      | -2.67            | 0                   |
| RNA_SPLICING (7)                                                                                                          | GO:0008380 | 243     | -2.65            | 0                   |
| DNA_RECOMBINATION (6)                                                                                                     | GO:0006310 | 122     | -2.65            | 0                   |
| MRNA_SPLICING_VIA_SPLICEOSOME (8)&RNA_SPLICING_VIA_TRANSESTERIFICATION_REACTIONS_WITH_BULGED_ADENOSINE_AS_NUCLEOPHILE (9) | GO:0000398 | 187     | -2.64            | 0                   |
| SPINDLE_ORGANIZATION (5)                                                                                                  | GO:0007051 | 77      | -2.64            | 0                   |
| CHROMOSOME_SEGREGATION (4)                                                                                                | GO:0007059 | 168     | -2.63            | 0                   |
| RNA_SPLICING_VIA_TRANSESTERIFICATION_REACTIONS (8)                                                                        | GO:0000375 | 191     | -2.63            | 0                   |
| MRNA_3_END_PROCESSING (8)                                                                                                 | GO:0031124 | 91      | -2.62            | 0                   |
| TELOMERE_MAINTENANCE_VIA_TELOMERE_LENGTHENING (5)                                                                         | GO:0010833 | 35      | -2.61            | 0                   |
| CHROMOSOME_LOCALIZATION (5)                                                                                               | GO:0050000 | 39      | -2.60            | 0                   |
| MITOTIC_SPINDLE_ORGANIZATION (6)                                                                                          | GO:0007052 | 46      | -2.60            | 0                   |
| TELOMERE_MAINTENANCE (4)                                                                                                  | GO:0000723 | 58      | -2.59            | 0                   |
| SISTER_CHROMATID_SEGREGATION (5)                                                                                          | GO:0000819 | 102     | -2.58            | 0                   |
| MITOTIC_SISTER_CHROMATID_SEGREGATION (6)                                                                                  | GO:0000070 | 101     | -2.57            | 0                   |
| ESTABLISHMENT_OF_CHROMOSOME_LOCALIZATION (5)                                                                              | GO:0051303 | 39      | -2.56            | 0                   |
| SPINDLE_ASSEMBLY (5)                                                                                                      | GO:0051225 | 46      | -2.55            | 0                   |
| MRNA_METABOLIC_PROCESS (6)                                                                                                | GO:0016071 | 423     | -2.54            | 0                   |
| RNA_3_END_PROCESSING (7)                                                                                                  | GO:0031123 | 102     | -2.54            | 0                   |
| METAPHASE_PLATE_CONGRESSION (5)                                                                                           | GO:0051310 | 36      | -2.54            | 0                   |
| NUCLEAR_DNA_REPLICATION (6)                                                                                               | GO:0033260 | 31      | -2.51            | 0                   |
| TELOMERE_MAINTENANCE_VIA_SEMI_CONSERVATIVE_REPLICATION (5)                                                                | GO:0032201 | 23      | -2.51            | 0                   |
| MITOTIC_RECOMBINATION (7)                                                                                                 | GO:0006312 | 34      | -2.50            | 0                   |
| TELOMERE_ORGANIZATION (5)                                                                                                 | GO:0032200 | 59      | -2.50            | 0                   |
| MITOTIC_METAPHASE_PLATE_CONGRESSION (4)                                                                                   | GO:0007080 | 30      | -2.49            | 0                   |
| MRNA_TRANSPORT (6)                                                                                                        | GO:0051028 | 64      | -2.48            | 0                   |
| DNA_REPAIR (4)                                                                                                            | GO:0006281 | 288     | -2.48            | 0                   |
| DNA_REPLICATION (6)                                                                                                       | GO:0006260 | 189     | -2.46            | 0                   |

| <b>GO description</b>                                                                              | <b>GO number</b> | <b># genes</b> | <b>NES<sup>a</sup></b> | <b>FWER<sup>b</sup> p</b> |
|----------------------------------------------------------------------------------------------------|------------------|----------------|------------------------|---------------------------|
| REGULATION_OF_CHROMOSOME_SEGREGATION (4)                                                           | GO:0051983       | 65             | -2.45                  | 0                         |
| MRNA_EXPORT_FROM_NUCLEUS (6)                                                                       | GO:0006406       | 63             | -2.44                  | 0                         |
| CELL_CYCLE_PHASE_TRANSITION (5)                                                                    | GO:0044770       | 370            | -2.42                  | 0                         |
| DNA_CONFORMATION_CHANGE (5)                                                                        | GO:0071103       | 123            | -2.42                  | 0.001                     |
| MITOTIC_CELL_CYCLE_PHASE_TRANSITION (6)                                                            | GO:0044772       | 356            | -2.42                  | 0.001                     |
| CENTROMERE_COMPLEX_ASSEMBLY (5)                                                                    | GO:0034508       | 35             | -2.42                  | 0.001                     |
| CELL_CYCLE_G1_S_PHASE_TRANSITION (6)                                                               | GO:0044843       | 192            | -2.41                  | 0.001                     |
| RNA_LOCALIZATION (4)                                                                               | GO:0006403       | 80             | -2.41                  | 0.001                     |
| TERMINATION_OF_RNA_POLYMERASE_II_TRANSCRIPTION (8)                                                 | GO:0006369       | 46             | -2.40                  | 0.001                     |
| ATTACHMENT_OF_SPINDLE_MICROTUBULES_TO_KINETOCHORE (5)                                              | GO:0008608       | 21             | -2.39                  | 0.001                     |
| G1_S_TRANSITION_OF_MITOTIC_CELL_CYCLE (7)                                                          | GO:0000082       | 187            | -2.39                  | 0.001                     |
| CHROMATIN_ASSEMBLY (5)                                                                             | GO:0031497       | 59             | -2.38                  | 0.001                     |
| ANAPHASE_PROMOTING_COMPLEX_DEPENDENT_PROTEASOMAL_UBIQUITIN_DEPENDENT_PROTEIN_CATABOLIC_PROCESS (8) | GO:0031145       | 105            | -2.38                  | 0.001                     |
| TELOMERE_MAINTENANCE_VIA_RECOMBINATION (5)                                                         | GO:0000722       | 27             | -2.38                  | 0.001                     |
| CELL_CYCLE_CHECKPOINT (5)                                                                          | GO:0000075       | 199            | -2.37                  | 0.001                     |
| PROTEIN_DNA_COMPLEX_SUBUNIT_ORGANIZATION (5)                                                       | GO:0071824       | 87             | -2.37                  | 0.002                     |
| MICROTUBULE_CYTOSKELETON_ORGANIZATION_INVOLVED_IN_MITOSIS (5)                                      | GO:1902850       | 28             | -2.37                  | 0.002                     |
| NEGATIVE_REGULATION_OF_CELL_CYCLE_PROCESS (4)                                                      | GO:0010948       | 174            | -2.35                  | 0.002                     |
| MITOTIC_NUCLEAR_DIVISION (5)                                                                       | GO:0007067       | 185            | -2.35                  | 0.003                     |
| MITOTIC_CELL_CYCLE_CHECKPOINT (6)                                                                  | GO:0007093       | 141            | -2.35                  | 0.003                     |
| MITOTIC_SPINDLE_ASSEMBLY (6)                                                                       | GO:0090307       | 24             | -2.34                  | 0.004                     |
| PROTEIN_DNA_COMPLEX_ASSEMBLY (6)                                                                   | GO:0065004       | 66             | -2.34                  | 0.004                     |
| REGULATION_OF_SPINDLE_ORGANIZATION (6)                                                             | GO:0090224       | 19             | -2.33                  | 0.004                     |
| RNA_EXPORT_FROM_NUCLEUS (6)                                                                        | GO:0006405       | 70             | -2.32                  | 0.004                     |
| ESTABLISHMENT_OF_RNA_LOCALIZATION (4)&RNA_TRANSPORT (5)&NUCLEIC_ACID_TRANSPORT (7)                 | GO:0051236       | 77             | -2.32                  | 0.004                     |
| TRANSCRIPTION_COUPLED_NUCLEOTIDE_EXCISION_REPAIR (6)                                               | GO:0006283       | 47             | -2.31                  | 0.005                     |
| MISMATCH_REPAIR (5)                                                                                | GO:0006298       | 23             | -2.31                  | 0.005                     |
| NEGATIVE_REGULATION_OF_CELL_CYCLE_PHASE_TRANSITION (5)                                             | GO:1901988       | 133            | -2.30                  | 0.006                     |
| DNA_PACKAGING (4)                                                                                  | GO:0006323       | 81             | -2.30                  | 0.007                     |

| <b>GO description</b>                                                                                                  | <b>GO number</b> | <b># genes</b> | <b>NES<sup>a</sup></b> | <b>FWER<sup>b</sup> p</b> |
|------------------------------------------------------------------------------------------------------------------------|------------------|----------------|------------------------|---------------------------|
| REGULATION_OF_MITOTIC_CELL_CYCLE_PHASE_TRANSITION (6)                                                                  | GO:1901990       | 165            | -2.29                  | 0.007                     |
| CHROMATIN_REMODELING_AT_CENTROMERE (7)                                                                                 | GO:0031055       | 30             | -2.29                  | 0.007                     |
| DNA_INTEGRITY_CHECKPOINT (6)                                                                                           | GO:0031570       | 132            | -2.28                  | 0.007                     |
| NUCLEAR_DIVISION (5)                                                                                                   | GO:0000280       | 222            | -2.28                  | 0.007                     |
| MEMBRANE_DISASSEMBLY (4)&MITOTIC_NUCLEAR_ENVELOPE_DISASSEMBLY (5)&NUCLEAR_ENVELOPE_DISASSEMBLY (5)                     | GO:0030397       | 42             | -2.28                  | 0.007                     |
| NEGATIVE_REGULATION_OF_MITOTIC_CELL_CYCLE_PHASE_TRANSITION (6)                                                         | GO:1901991       | 127            | -2.27                  | 0.007                     |
| REGULATION_OF_CELL_CYCLE_PHASE_TRANSITION (6)                                                                          | GO:1901987       | 177            | -2.27                  | 0.007                     |
| CHROMATIN_ASSEMBLY_OR_DISASSEMBLY (5)                                                                                  | GO:0006333       | 81             | -2.27                  | 0.008                     |
| ATP_DEPENDENT_CHROMATIN_REMODELING (7)                                                                                 | GO:0043044       | 53             | -2.27                  | 0.008                     |
| NUCLEOSOME_ORGANIZATION (5)                                                                                            | GO:0034728       | 68             | -2.25                  | 0.009                     |
| AMINO_ACID_ACTIVATION (5)&TRNA_AMINOACYLATION (6)                                                                      | GO:0043038       | 45             | -2.23                  | 0.012                     |
| TRNA_AMINOACYLATION_FOR_PROTEIN_TRANSLATION (7)                                                                        | GO:0006418       | 42             | -2.23                  | 0.012                     |
| CENP_A_CONTAINING_CHROMATIN_ORGANIZATION (5)&CENP_A_CONTAINING_NUCLEOSOME_ASSEMBLY (6)                                 | GO:0061641       | 28             | -2.23                  | 0.012                     |
| HISTONE_EXCHANGE (6)                                                                                                   | GO:0043486       | 33             | -2.23                  | 0.012                     |
| NUCLEAR_ENVELOPE_ORGANIZATION (4)                                                                                      | GO:0006998       | 57             | -2.23                  | 0.012                     |
| MITOTIC_DNA_INTEGRITY_CHECKPOINT (7)                                                                                   | GO:0044774       | 84             | -2.22                  | 0.013                     |
| MICROTUBULE_CYTOSKELETON_ORGANIZATION (5)                                                                              | GO:0000226       | 233            | -2.21                  | 0.013                     |
| REGULATION_OF_MICROTUBULE_CYTOSKELETON_ORGANIZATION (5)                                                                | GO:0070507       | 78             | -2.21                  | 0.013                     |
| REGULATION_OF_RNA_STABILITY (4)                                                                                        | GO:0043487       | 34             | -2.21                  | 0.013                     |
| NUCLEOSOME_ASSEMBLY (6)                                                                                                | GO:0006334       | 47             | -2.21                  | 0.013                     |
| SPINDLE_CHECKPOINT (6)                                                                                                 | GO:0031577       | 45             | -2.21                  | 0.013                     |
| DNA_CATABOLIC_PROCESS (6)                                                                                              | GO:0006308       | 77             | -2.20                  | 0.016                     |
| DNA_TEMPLATED_TRANSCRIPTION_TERMINATION (7)                                                                            | GO:0006353       | 87             | -2.20                  | 0.018                     |
| SIGNAL_TRANSDUCTION_INVOLVED_IN_CELL_CYCLE_CHECKPOINT (5)                                                              | GO:0072395       | 66             | -2.19                  | 0.021                     |
| SIGNAL_TRANSDUCTION_INVOLVED_IN_DNA_INTEGRITY_CHECKPOINT (6)&SIGNAL_TRANSDUCTION_INVOLVED_IN_DNA_DAMAGE_CHECKPOINT (7) | GO:0072401       | 65             | -2.19                  | 0.021                     |
| DNA_DAMAGE_CHECKPOINT (6)                                                                                              | GO:0000077       | 125            | -2.19                  | 0.023                     |
| VIRAL_TRANSCRIPTION (5)                                                                                                | GO:0019083       | 178            | -2.19                  | 0.023                     |
| CHROMATIN_REMODELING (6)                                                                                               | GO:0006338       | 92             | -2.19                  | 0.025                     |



| <b>GO description</b>                                                                                                                                                                                                                                                                  | <b>GO number</b> | <b># genes</b> | <b>NES<sup>a</sup></b> | <b>FWER<sup>b</sup> p</b> |
|----------------------------------------------------------------------------------------------------------------------------------------------------------------------------------------------------------------------------------------------------------------------------------------|------------------|----------------|------------------------|---------------------------|
| REGULATION_OF_MRNA_STABILITY (5)                                                                                                                                                                                                                                                       | GO:0043488       | 33             | -2.19                  | 0.026                     |
| REGULATION_OF_TRANSCRIPTION_INVOLVED_IN_G1_S_TRANSITION_OF_MITOTIC_CELL_CYCLE (5)                                                                                                                                                                                                      | GO:0000083       | 22             | -2.18                  | 0.028                     |
| NUCLEIC_ACID_PHOSPHODIESTER_BOND_HYDROLYSIS (6)                                                                                                                                                                                                                                        | GO:0090305       | 118            | -2.17                  | 0.029                     |
| MITOTIC_SPINDLE_ASSEMBLY_CHECKPOINT (7)                                                                                                                                                                                                                                                | GO:0007094       | 38             | -2.17                  | 0.029                     |
| ORGANELLE_FISSION (4)                                                                                                                                                                                                                                                                  | GO:0048285       | 248            | -2.17                  | 0.031                     |
| NUCLEOBASE_CONTAINING_COMPOUND_TRANSPORT (6)                                                                                                                                                                                                                                           | GO:0015931       | 93             | -2.16                  | 0.032                     |
| NUCLEOTIDE_EXCISION_REPAIR_DNA_GAP_FILLING (6)                                                                                                                                                                                                                                         | GO:0006297       | 19             | -2.16                  | 0.033                     |
| DNA_REPLICATION_INDEPENDENT_NUCLEOSOME_ORGANIZATION (6)&DNA_REPLICATION_INDEPENDENT_NUCLEOSOME_ASSEMBLY (7)                                                                                                                                                                            | GO:0034724       | 39             | -2.16                  | 0.033                     |
| REGULATION_OF_MITOTIC_SPINDLE_ORGANIZATION (6)                                                                                                                                                                                                                                         | GO:0060236       | 15             | -2.15                  | 0.038                     |
| DNA_DAMAGE_RESPONSE_SIGNAL_TRANSDUCTION_BY_P53_CLASS_MEDIATOR_RESULTING_IN_CELL_CYCLE_ARREST (6)                                                                                                                                                                                       | GO:0006977       | 60             | -2.15                  | 0.039                     |
| NEGATIVE_REGULATION_OF_MITOTIC_CELL_CYCLE (5)                                                                                                                                                                                                                                          | GO:0045930       | 174            | -2.15                  | 0.039                     |
| NEGATIVE_REGULATION_OF_UBIQUITIN_PROTEIN_LIGASE_ACTIVITY_INVOLVED_IN_MITOTIC_CELL_CYCLE (6)                                                                                                                                                                                            | GO:0051436       | 65             | -2.15                  | 0.039                     |
| MITOTIC_DNA_DAMAGE_CHECKPOINT (7)                                                                                                                                                                                                                                                      | GO:0044773       | 80             | -2.14                  | 0.039                     |
| SIGNAL_TRANSDUCTION_INVOLVED_IN_MITOTIC_CELL_CYCLE_CHECKPOINT (6)&SIGNAL_TRANSDUCTION_INVOLVED_IN_MITOTIC_DNA_INTEGRITY_CHECKPOINT (7)&SIGNAL_TRANSDUCTION_INVOLVED_IN_MITOTIC_DNA_DAMAGE_CHECKPOINT (8)                                                                               | GO:0072413       | 63             | -2.14                  | 0.042                     |
| NEGATIVE_REGULATION_OF_SISTER_CHROMATID_SEGREGATION (5)&NEGATIVE_REGULATION_OF_MITOTIC_SISTER_CHROMATID_SEPARATION (5)&NEGATIVE_REGULATION_OF_MITOTIC_SISTER_CHROMATID_SEGREGATION (6)&NEGATIVE_REGULATION_OF_MITOTIC_METAPHASE_ANAPHASE_TRANSITION (6)&MITOTIC_SPINDLE_CHECKPOINT (6) | GO:0033046       | 40             | -2.14                  | 0.042                     |
| REGULATION_OF_SISTER_CHROMATID_SEGREGATION (5)&REGULATION_OF_MITOTIC_SISTER_CHROMATID_SEGREGATION (6)                                                                                                                                                                                  | GO:0033045       | 50             | -2.14                  | 0.044                     |
| SPINDLE_ASSEMBLY_CHECKPOINT (7)                                                                                                                                                                                                                                                        | GO:0071173       | 39             | -2.14                  | 0.044                     |

| <b>GO description</b>                                                | <b>GO number</b> | <b># genes</b> | <b>NES<sup>a</sup></b> | <b>FWER<sup>b</sup> p</b> |
|----------------------------------------------------------------------|------------------|----------------|------------------------|---------------------------|
| NUCLEOTIDE_EXCISION_REPAIR (5)                                       | GO:0006289       | 69             | -2.14                  | 0.045                     |
| SIGNAL_TRANSDUCTION_IN_RESPONSE_TO_DNA_DAMAGE (6)                    | GO:0042770       | 109            | -2.13                  | 0.046                     |
| REGULATION_OF_CHROMOSOME_ORGANIZATION (5)                            | GO:0033044       | 140            | -2.13                  | 0.047                     |
| REGULATION_OF_CELL_CYCLE_PROCESS (5)                                 | GO:0010564       | 339            | -2.13                  | 0.048                     |
| MULTI_ORGANISM_METABOLIC_PROCESS (3)                                 | GO:0044033       | 189            | -2.12                  | 0.05                      |
| DNA_DAMAGE_RESPONSE_SIGNAL_TRANSDUCTION_BY_P53_CLASS_MEDIATOR (7)    | GO:0030330       | 94             | -2.12                  | 0.05                      |
| Up on right side:                                                    |                  |                |                        |                           |
| REGULATION_OF_SYSTEM_PROCESS (4)                                     | GO:0044057       | 168            | 2.26                   | 0.004                     |
| REGULATION_OF_CELL_JUNCTION_ASSEMBLY (4)                             | GO:1901888       | 43             | 2.25                   | 0.004                     |
| MUSCLE_CONTRACTION (6)                                               | GO:0006936       | 163            | 2.24                   | 0.007                     |
| RENAL_WATER_HOMEOSTASIS (6)                                          | GO:0003091       | 25             | 2.20                   | 0.014                     |
| MUSCLE_SYSTEM_PROCESS (5)                                            | GO:0003012       | 187            | 2.20                   | 0.014                     |
| REGULATION_OF_SYNAPTIC_TRANSMISSION (3)                              | GO:0050804       | 89             | 2.19                   | 0.017                     |
| BLOOD_CIRCULATION (6)                                                | GO:0008015       | 178            | 2.16                   | 0.023                     |
| WATER_TRANSPORT (5)                                                  | GO:0006833       | 24             | 2.16                   | 0.023                     |
| MULTICELLULAR_ORGANISMAL_WATER_HOMEOSTASIS (5)&WATER_HOMEOSTASIS (6) | GO:0050891       | 31             | 2.16                   | 0.026                     |
| CIRCULATORY_SYSTEM_PROCESS (5)                                       | GO:0003013       | 178            | 2.16                   | 0.027                     |
| FLUID_TRANSPORT (4)                                                  | GO:0042044       | 25             | 2.16                   | 0.028                     |
| SYNAPTIC_TRANSMISSION (3)                                            | GO:0007268       | 391            | 2.15                   | 0.034                     |
| CELL_JUNCTION_ORGANIZATION (4)                                       | GO:0034330       | 168            | 2.14                   | 0.037                     |
| HEART_PROCESS (6)                                                    | GO:0003015       | 96             | 2.14                   | 0.037                     |
| CELL_JUNCTION_ASSEMBLY (5)                                           | GO:0034329       | 154            | 2.13                   | 0.043                     |
| METAL_ION_TRANSPORT (6)                                              | GO:0030001       | 333            | 2.12                   | 0.049                     |
| MULTICELLULAR_ORGANISMAL_MOVEMENT (4)&MUSCULOSKELETAL_MOVEMENT (5)   | GO:0050879       | 16             | 2.12                   | 0.05                      |

<sup>a</sup> NES = normalised enrichment score; positive = upregulated on the right; negative = upregulated on the left.

<sup>b</sup> FWER = familywise error rate. Included in the table are terms with FWER <= 0.05.

**Table S4. Transcription factor targets significantly lateralised in spinal cord**

| NAME                    | Description <sup>a</sup>                                                                                                                                                                                                                                     | # genes | NES <sup>b</sup> | FWER <sup>c</sup><br>p | Result in hindbrain <sup>d</sup> |
|-------------------------|--------------------------------------------------------------------------------------------------------------------------------------------------------------------------------------------------------------------------------------------------------------|---------|------------------|------------------------|----------------------------------|
| Up on left side:        |                                                                                                                                                                                                                                                              |         |                  |                        |                                  |
| V\$NRSF_01              | Genes with promoter regions [-2kb,2kb] around transcription start site containing the motif TTCAGCACCACGGACAGMGCC which matches annotation for <b>REST: RE1-silencing transcription factor</b>                                                               | 73      | -3.15            | 0                      |                                  |
| CAGNWMCNNGAC_UNKNOWN    | Genes with promoter regions [-2kb,2kb] around transcription start site containing motif CAGNWMCNNGAC. Motif does not match any known transcription factor                                                                                                    | 64      | -2.66            | 0                      |                                  |
| GTRYCATRR_UNKNOWN       | Genes with promoter regions [-2kb,2kb] around transcription start site containing motif GTRYCATRR. Motif does not match any known transcription factor                                                                                                       | 135     | -2.38            | 0                      |                                  |
| V\$SF1_Q6               | Genes with promoter regions [-2kb,2kb] around transcription start site containing the motif TGRCTTG which matches annotation for <b>SF1: splicing factor 1</b>                                                                                               | 220     | -1.89            | 0.02                   |                                  |
| V\$E47_01               | Genes with promoter regions [-2kb,2kb] around transcription start site containing the motif VSNGCAGGTGKNCNN which matches annotation for <b>TCF3: transcription factor 3</b> (E2A immunoglobulin enhancer binding factors E12/E47)                           | 209     | -1.86            | 0.024                  |                                  |
| YGCANTGCR_UNKNOWN       | Genes with promoter regions [-2kb,2kb] around transcription start site containing motif YGCANTGCR. Motif does not match any known transcription factor                                                                                                       | 116     | -1.85            | 0.033                  |                                  |
| Up on right side:       |                                                                                                                                                                                                                                                              |         |                  |                        |                                  |
| SGCGSSAAA_V\$E2F1DP2_01 | Genes with promoter regions [-2kb,2kb] around transcription start site containing the motif SGCGSSAAA which matches annotation for <b>E2F1: E2F transcription factor 1 - TFDP1: transcription factor Dp-1 RB1: retinoblastoma 1</b> (including osteosarcoma) | 151     | 1.92             | 0.038                  | -                                |
| V\$E2F1_Q6              | Genes with promoter regions [-2kb,2kb] around transcription start site containing the motif NTTTCGCGCS which matches annotation for <b>E2F1: E2F transcription factor 1</b>                                                                                  | 212     | 1.83             | 0.046                  | -                                |

<sup>a</sup> Grey text: motifs without known transcription factors.

<sup>b</sup> NES=normalised enrichment score.

<sup>c</sup> FWER=family-wise error rate.

<sup>d</sup> - = also significantly enriched in left- side hindbrain.

**Table S5. Transcription factor targets significantly lateralised in hindbrain**

| NAME                    | Description <sup>a</sup>                                                                                                                                                                                                                                                                  | # genes | NES <sup>b</sup> | FWER <sup>c</sup><br>p- |
|-------------------------|-------------------------------------------------------------------------------------------------------------------------------------------------------------------------------------------------------------------------------------------------------------------------------------------|---------|------------------|-------------------------|
| Up on left side:        |                                                                                                                                                                                                                                                                                           |         |                  |                         |
| V\$E2F1_Q6              | Genes with promoter regions [-2kb,2kb] around transcription start site containing the motif TTTS <sub>2</sub> GC <sub>2</sub> GS which matches annotation for <b>E2F1: E2F transcription factor 1</b>                                                                                     | 213     | -2.66            | 0                       |
| SGCGSSAAA_V\$E2F1DP2_01 | Genes with promoter regions [-2kb,2kb] around transcription start site containing the motif SGCGSSAAA which matches annotation for <b>E2F1: E2F transcription factor 1- TFDP1: transcription factor Dp-1 - RB1: retinoblastoma 1</b> (including osteosarcoma)                             | 152     | -2.64            | 0                       |
| V\$E2F1DP1_01           | Genes with promoter regions [-2kb,2kb] around transcription start site containing the motif TTTC <sub>2</sub> spinal cordGC which matches annotation for <b>E2F1: E2F transcription factor 1 - TFDP1: transcription factor Dp-1</b>                                                       | 212     | -2.59            | 0                       |
| V\$E2F_Q2               | Genes with promoter regions [-2kb,2kb] around transcription start site containing motif TTTS <sub>2</sub> GC <sub>2</sub> GC. Motif does not match any known transcription factor                                                                                                         | 212     | -2.57            | 0                       |
| V\$E2F4DP1_01           | Genes with promoter regions [-2kb,2kb] around transcription start site containing the motif TTTS <sub>2</sub> GC <sub>2</sub> GC which matches annotation for <b>E2F4: E2F transcription factor 4, p107/p130-binding - TFDP1: transcription factor Dp-1</b>                               | 218     | -2.56            | 0                       |
| V\$E2F4DP2_01           | Genes with promoter regions [-2kb,2kb] around transcription start site containing the motif TTTC <sub>2</sub> spinal cordGC which matches annotation for <b>E2F4: E2F transcription factor 4, p107/p130-binding - TFDP2: transcription factor Dp-2 (E2F dimerization partner 2)</b>       | 212     | -2.56            | 0                       |
| V\$E2F1DP1RB_01         | Genes with promoter regions [-2kb,2kb] around transcription start site containing the motif TTTS <sub>2</sub> GC <sub>2</sub> GC which matches annotation for <b>E2F1: E2F transcription factor 1 - TFDP1: transcription factor Dp-1 - RB1: retinoblastoma 1</b> (including osteosarcoma) | 212     | -2.54            | 0                       |
| V\$E2F1DP2_01           | Genes with promoter regions [-2kb,2kb] around transcription start site containing the motif TTTS <sub>2</sub> spinal cordGC which matches annotation for <b>E2F1: E2F transcription factor 1 0 - TFDP2: transcription factor Dp-2 (E2F dimerization partner 2)</b>                        | 212     | -2.54            | 0                       |
| V\$E2F_Q6               | Genes with promoter regions [-2kb,2kb] around transcription start site containing motif TTTS <sub>2</sub> GC <sub>2</sub> GS. Motif does not match any known transcription factor                                                                                                         | 213     | -2.50            | 0                       |

| NAME                                | Description <sup>a</sup>                                                                                                                                                                    | # genes | NES <sup>b</sup> | FWER <sup>c</sup><br>p- |
|-------------------------------------|---------------------------------------------------------------------------------------------------------------------------------------------------------------------------------------------|---------|------------------|-------------------------|
| V\$E2F_Q4                           | Genes with promoter regions [-2kb,2kb] around transcription start site containing motif TTTSGCGS. Motif does not match any known transcription factor                                       | 217     | -2.47            | 0                       |
| V\$E2F_Q4_01                        | Genes with promoter regions [-2kb,2kb] around transcription start site containing the motif NCspinal cordGCsAAAN which matches annotation for <b>E2F - TFDP1: transcription factor Dp-1</b> | 218     | -2.39            | 0                       |
| V\$E2F1_Q4_01                       | Genes with promoter regions [-2kb,2kb] around transcription start site containing the motif TTTSGCGSG which matches annotation for <b>E2F - TFDP1: transcription factor Dp-1</b>            | 206     | -2.39            | 0                       |
| V\$E2F1_Q3                          | Genes with promoter regions [-2kb,2kb] around transcription start site containing the motif NKTSpinal cordGC which matches annotation for <b>E2F1: E2F transcription factor 1</b>           | 224     | -2.39            | 0                       |
| GCGspinal<br>cordMNTTT_U<br>UNKNOWN | Genes with promoter regions [-2kb,2kb] around transcription start site containing motif GCGspinal cordMNTTT. Motif does not match any known transcription factor                            | 67      | -2.35            | 0                       |
| V\$E2F_Q3_01                        | Genes with promoter regions [-2kb,2kb] around transcription start site containing the motif TTTSGCGSG which matches annotation for <b>E2F - TFDP1: transcription factor Dp-1</b>            | 212     | -2.34            | 0                       |
| V\$E2F1_Q6_01                       | Genes with promoter regions [-2kb,2kb] around transcription start site containing the motif NTTTCGCGCS which matches annotation for <b>E2F1: E2F transcription factor 1</b>                 | 216     | -2.32            | 0                       |
| V\$E2F_Q3                           | Genes with promoter regions [-2kb,2kb] around transcription start site containing motif TTTCGCGC. Motif does not match any known transcription factor                                       | 207     | -2.24            | 0                       |
| KTGGYRSGAA_<br>UNKNOWN              | Genes with promoter regions [-2kb,2kb] around transcription start site containing motif KTGGYRSGAA. Motif does not match any known transcription factor                                     | 68      | -2.19            | 0                       |
| V\$E2F_Q6_01                        | Genes with promoter regions [-2kb,2kb] around transcription start site containing the motif NKCGCGCSAAAN which matches annotation for <b>E2F - TFDP1: transcription factor Dp-1</b>         | 222     | -2.19            | 0                       |
| V\$E2F_Q3                           | Genes with promoter regions [-2kb,2kb] around transcription start site containing motif TTTSGCGGMNR. Motif does not match any known transcription factor                                    | 225     | -2.16            | 0                       |
| V\$E2F_Q1                           | Genes with promoter regions [-2kb,2kb] around transcription start site containing motif TWSGCGGAAAAYKR. Motif does not match any known transcription factor                                 | 60      | -2.07            | 0.002                   |

| NAME                    | Description <sup>a</sup>                                                                                                                                                   | # genes | NES <sup>b</sup> | FWER <sup>c</sup><br>p- |
|-------------------------|----------------------------------------------------------------------------------------------------------------------------------------------------------------------------|---------|------------------|-------------------------|
| V\$NFY_C                | Genes with promoter regions [-2kb,2kb] around transcription start site containing motif NCTGATTGGYTASY. Motif does not match any known transcription factor                | 198     | -2.03            | 0.003                   |
| GCCATNTTG_V<br>\$YY1_Q6 | Genes with promoter regions [-2kb,2kb] around transcription start site containing the motif GCCATNTTG which matches annotation for YY1:<br><b>YY1 transcription factor</b> | 404     | -1.97            | 0.011                   |
| KCCGNSWTTT_<br>UNKNOWN  | Genes with promoter regions [-2kb,2kb] around transcription start site containing motif KCCGNSWTTT. Motif does not match any known transcription factor                    | 100     | -1.92            | 0.024                   |
| TAANNYSGCG_<br>UNKNOWN  | Genes with promoter regions [-2kb,2kb] around transcription start site containing motif TAANNYSGCG. Motif does not match any known transcription factor                    | 76      | -1.90            | 0.035                   |
| GGCNKCCATNK_<br>UNKNOWN | Genes with promoter regions [-2kb,2kb] around transcription start site containing motif GGCNKCCATNK. Motif does not match any known transcription factor                   | 112     | -1.89            | 0.036                   |
| V\$E2F1_Q4              | Genes with promoter regions [-2kb,2kb] around transcription start site containing the motif NTTSGCGG which matches annotation for <b>E2F1: E2F transcription factor 1</b>  | 223     | -1.89            | 0.037                   |
| Up on right side:       |                                                                                                                                                                            |         |                  |                         |
| V\$HMEF2_Q6             | Genes with promoter regions [-2kb,2kb] around transcription start site containing motif SKYTAAAAATAACYCH. Motif does not match any known transcription factor              | 113     | 1.93             | 0.037                   |

<sup>a</sup> Grey text: motifs without known transcription factors.

<sup>b</sup> NES=normalised enrichment score.

<sup>c</sup> FWER=family-wise error rate.

## Supplementary Figures

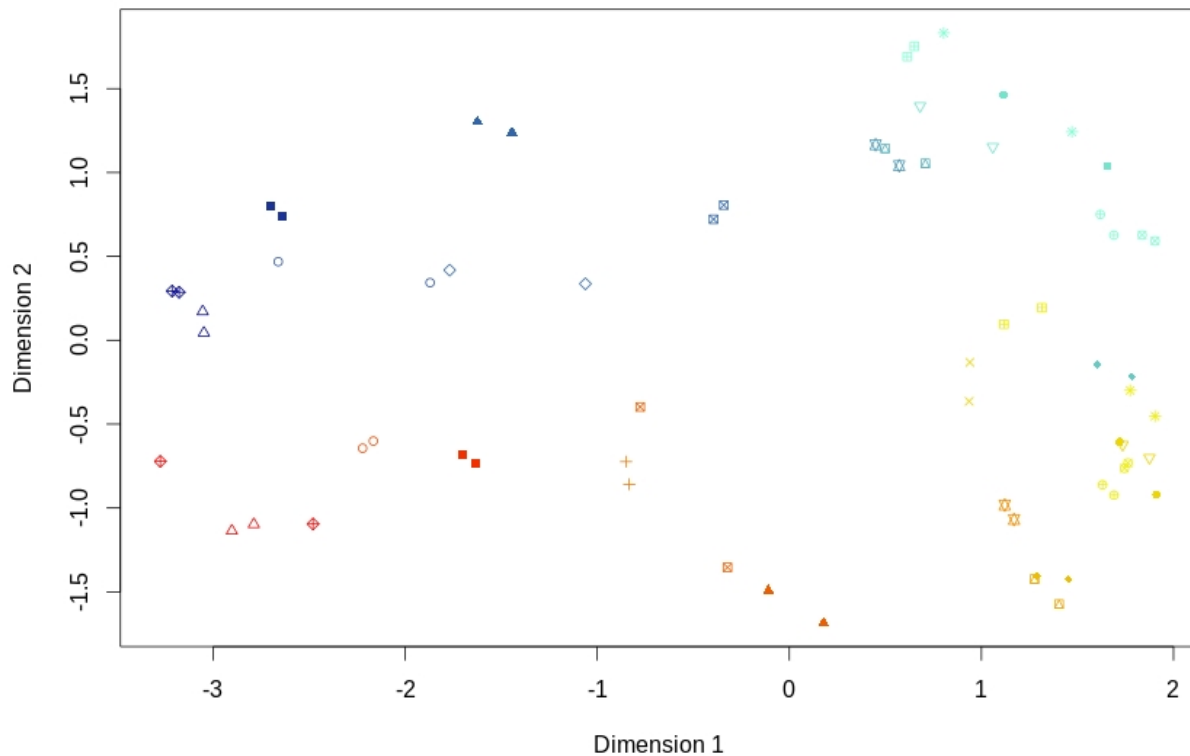

**Figure S1. Multidimensional scaling plot based on  $\log_2$  (cpm) expression values for genes surviving filtering for all RNASeq libraries, and after all quality control stages.**

Spinal cord samples are shown in a spectrum of blue shades from dark (earlier Carnegie Stages (CS)) to light (later CS stages). Hindbrain samples are shown in a color spectrum through red-orange-yellow representing earlier (dark red) to later (yellow) CS stages. The same shaped icons represent samples from the same individual embryo (left and right spinal cord, and left and right hindbrain). This analysis of the expression data was purely data-driven, receiving no information regarding sample CS or tissue identity. Nonetheless, dimension 1 clearly ordered samples according to embryonic age, while dimension 2 largely distinguished samples from spinal cord and hindbrain. MDS was also run separately for spinal cord and hindbrain samples to check if major dimensions might emerge reflecting laterality, but none of the top ten dimensions for either structure was associated with the left-right distinction (not shown).

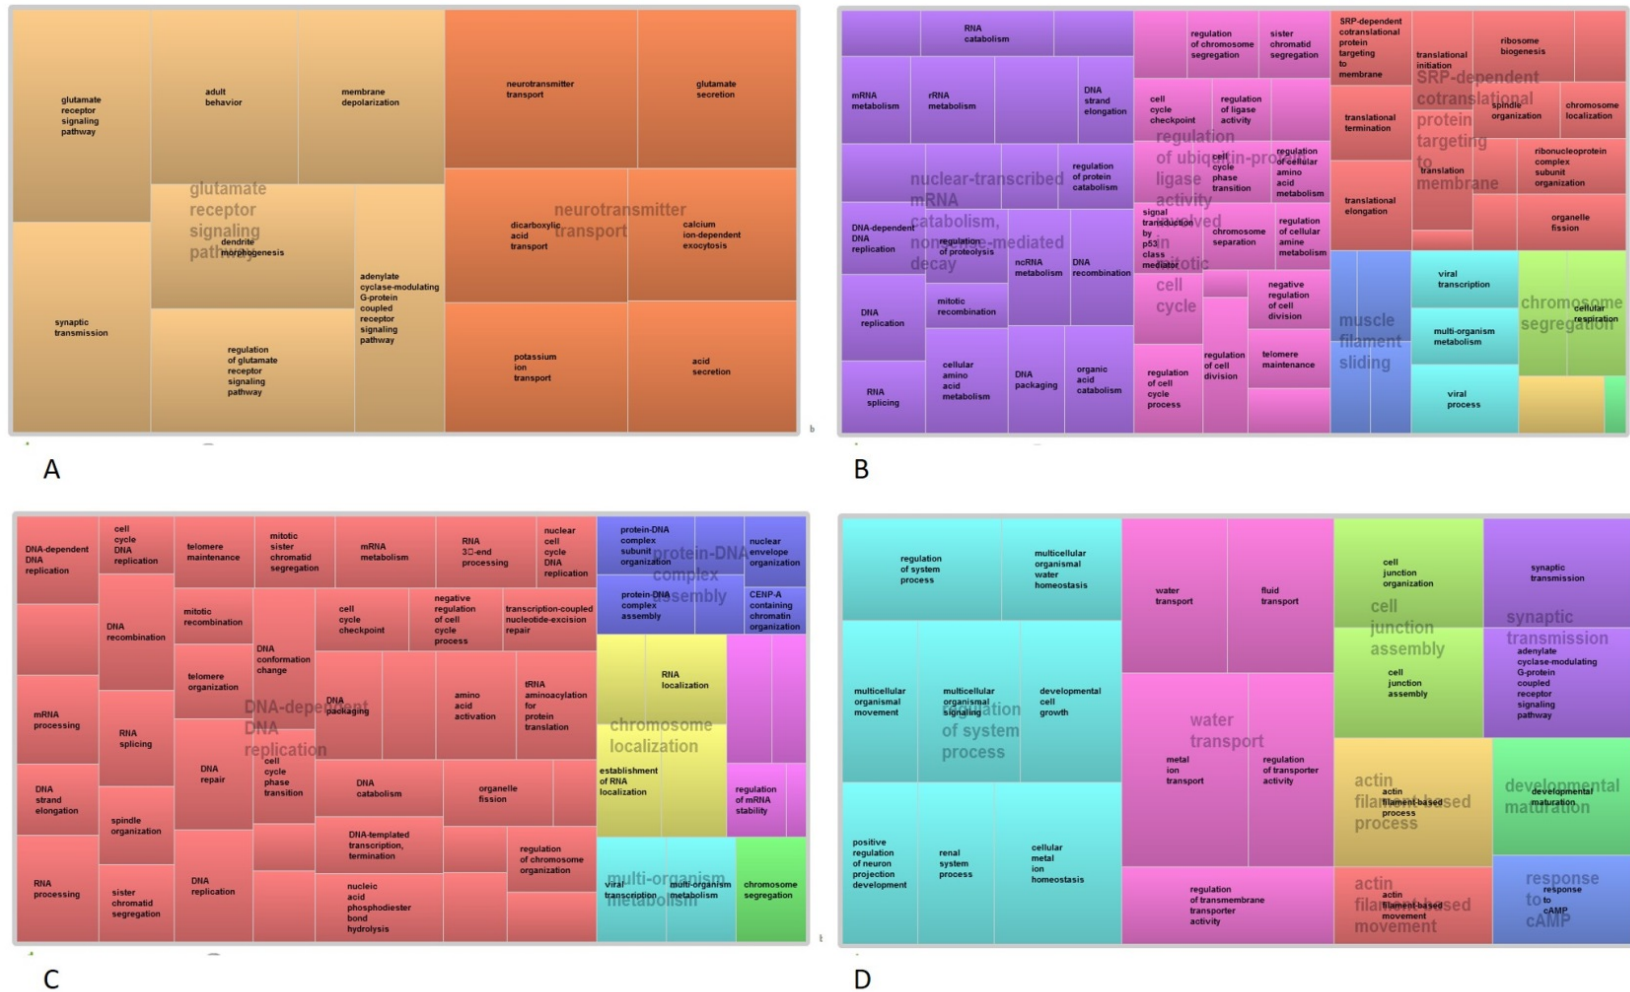

**Figure S2. REVIGO (Treemap) clustered map of Gene Ontology terms with more than 2-fold difference between left and right.**

(A) Upregulated in left spinal cord. (B) Upregulated in right spinal cord. (C) Upregulated in left hindbrain. (D) Upregulated in right hindbrain.



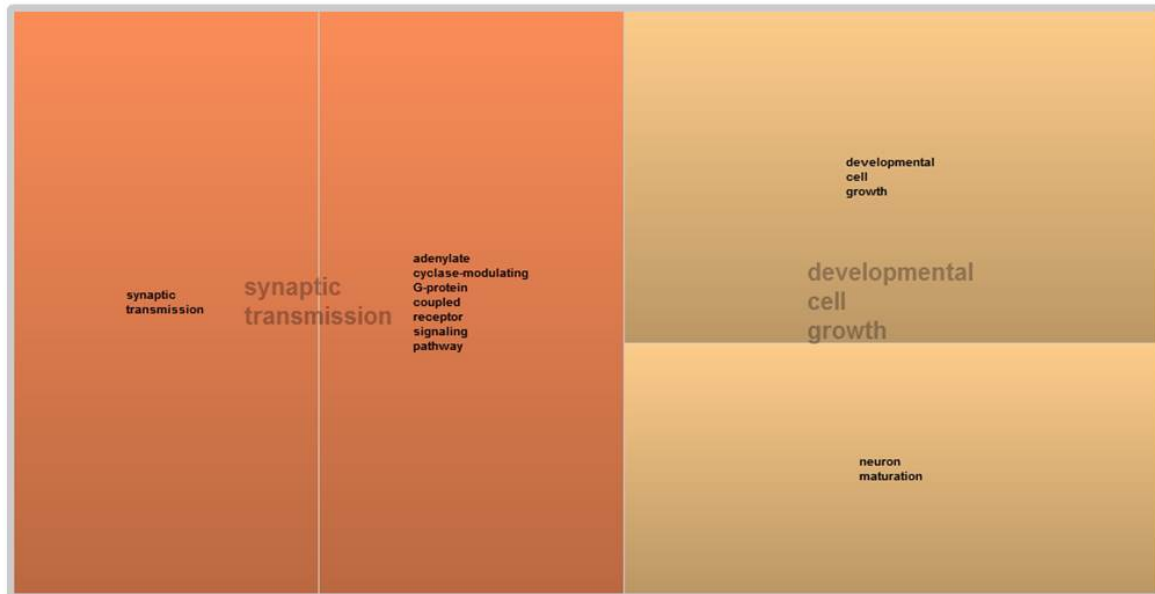

A

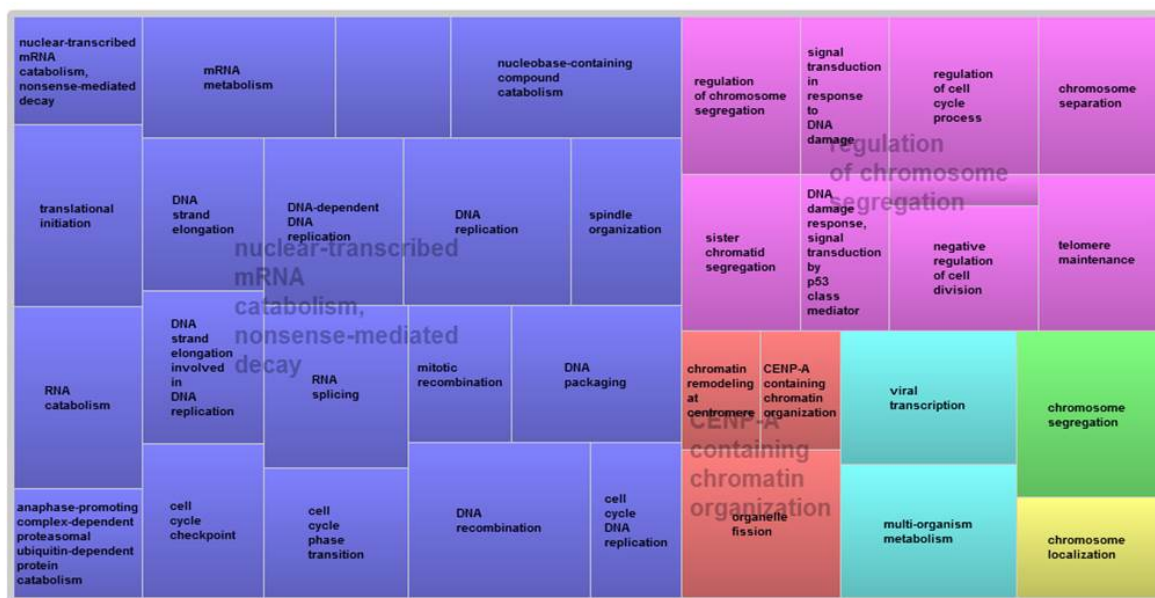

B

**Figure S3. REVIGO clustered map of Gene Ontology terms with more than 2-fold difference between left and right in both spinal cord and hindbrain.**

(A) Upregulated in left spinal cord and right hindbrain. (B) Upregulated in right spinal cord and left hindbrain.

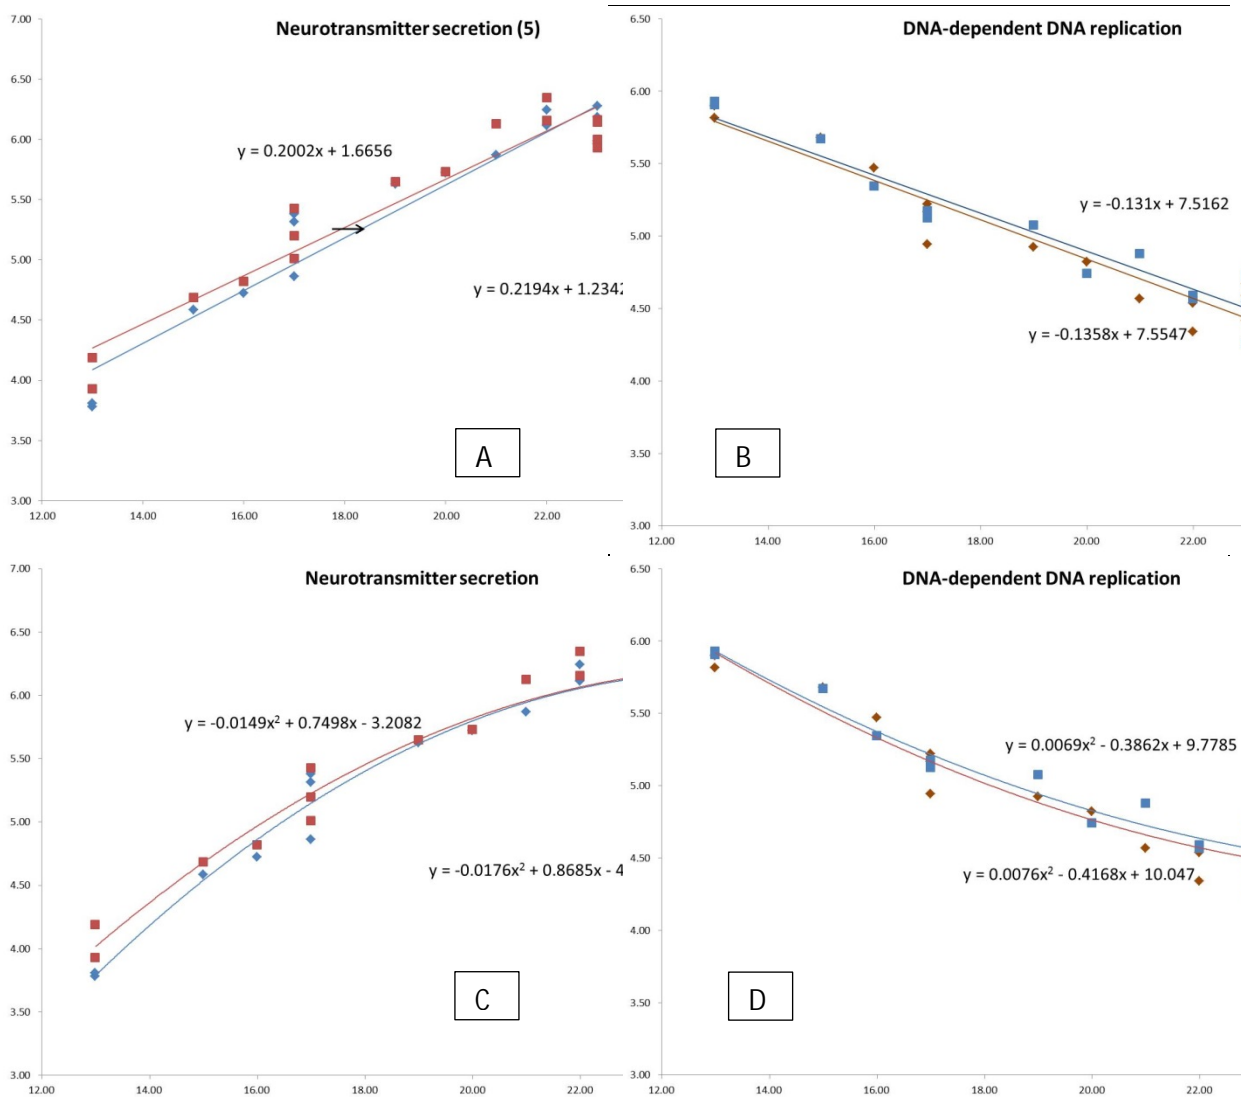

**Figure S4. Estimate of asynchrony between left and right spinal cord.**

X axis: Carnegie stage of embryo. Y-axis: median expression as log<sub>2</sub> (cpm). A (linear) and C (quadratic) fit for median expression of genes in gene-set 'Neurotransmitter secretion', the most asymmetrically expressed GO-set with higher expression in the left spinal cord, vs Carnegie stage. The black arrow (in A) indicates the asynchrony: i.e. the time the blue line needs to reach the same expression level as the red line. B (linear) and D (quadratic) fit for median expression of genes in the gene-set 'DNA-dependent DNA replication', the most asymmetrically expressed gene-set showing higher expression in the right spinal cord. Cpm = counts per million.

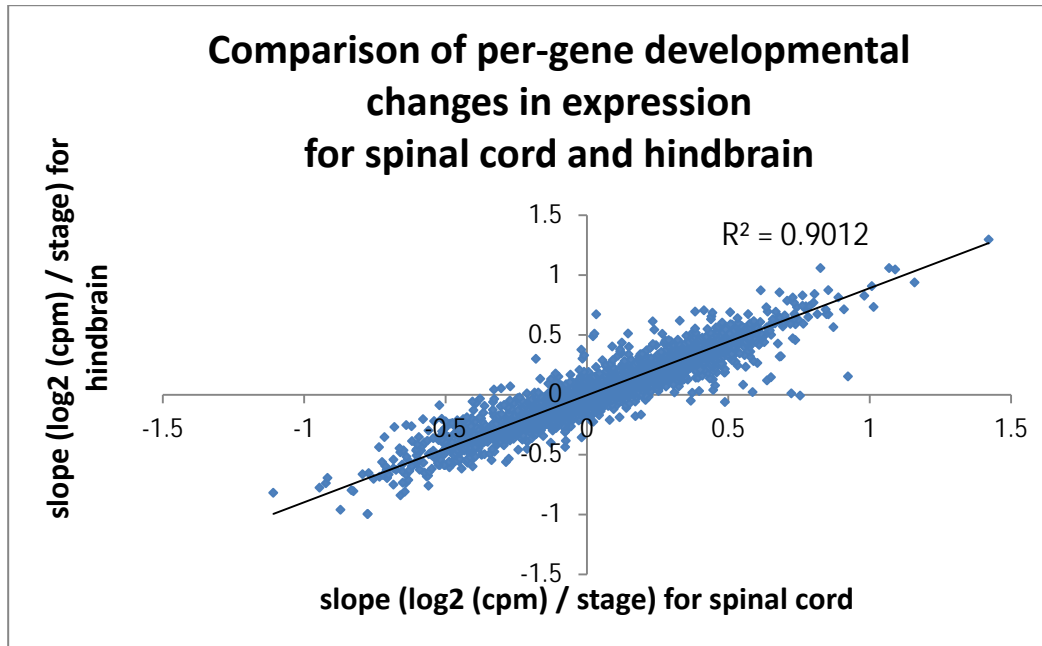

**Figure S5. Comparison of per-gene developmental changes of expression in hindbrain vs spinal cord.**

The expression trajectory with age is very similar in the two tissues.

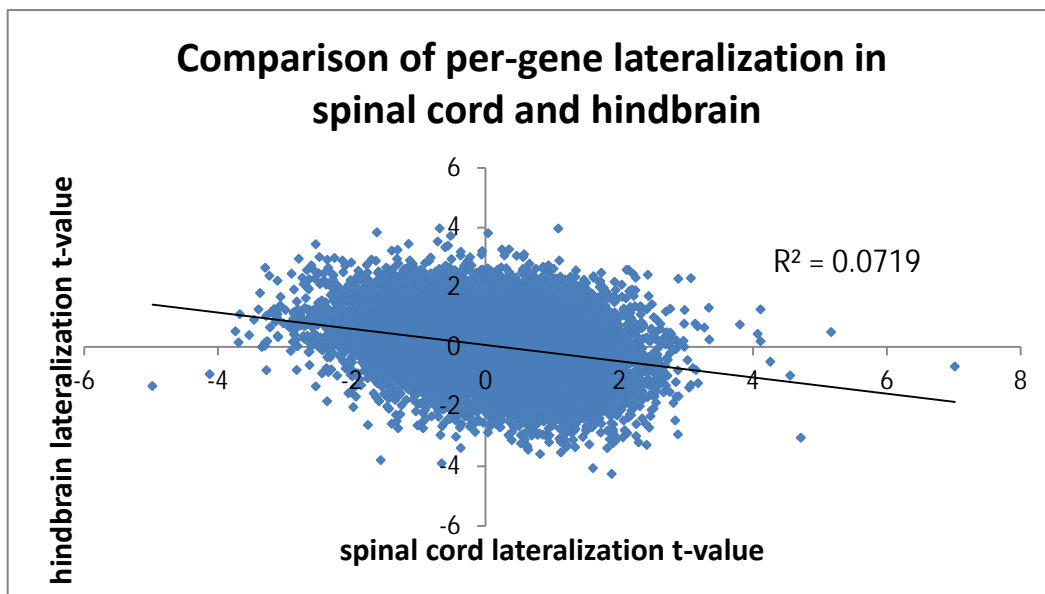

**Figure S6. Comparison of per-gene lateralization t-values for hindbrain vs spinal cord.**

The left-right differences for most genes were not strongly correlated between the two tissues, and were overall mirrored (weak negative correlation). Yet, at the gene-set level, strongly lateralised sets in spinal cord also showed similar, but mirrored, patterns in hindbrain, as shown in Figures 2 and 3 and Supplemental Figures S2 and S3. (DE=differential expression).

## Supplementary References

1. Gerrelli D, Lisgo S, Copp AJ, Lindsay S (2015): Enabling research with human embryonic and fetal tissue resources. *Development*. 142:3073-3076.
2. O'Rahilly R, Muller F (2010): Developmental stages in human embryos: revised and new measurements. *Cells Tissues Organs*. 192:73-84.
3. Bullen P, Wilson D (1997): The Carnegie Staging of Human Embryos: a Practical Guide. In: Strachan T, Lindsay S, Wilson DI, editors. *Molecular Genetics of Early Human Development*: Garland Science.
4. Li R, Yu C, Li Y, Lam TW, Yiu SM, Kristiansen K, et al. (2009): SOAP2: an improved ultrafast tool for short read alignment. *Bioinformatics*. 25:1966-1967.
5. Wang Z, Gerstein M, Snyder M (2009): RNA-Seq: a revolutionary tool for transcriptomics. *Nature reviews Genetics*. 10:57-63.
6. Trapnell C, Pachter L, Salzberg SL (2009): TopHat: discovering splice junctions with RNA-Seq. *Bioinformatics*. 25:1105-1111.
7. Trapnell C, Hendrickson DG, Sauvageau M, Goff L, Rinn JL, Pachter L (2013): Differential analysis of gene regulation at transcript resolution with RNA-seq. *Nature biotechnology*. 31:46-53.
8. Trapnell C, Roberts A, Goff L, Pertea G, Kim D, Kelley DR, et al. (2012): Differential gene and transcript expression analysis of RNA-seq experiments with TopHat and Cufflinks. *Nature protocols*. 7:562-578.
9. Li R, Li Y, Fang X, Yang H, Wang J, Kristiansen K, et al. (2009): SNP detection for massively parallel whole-genome resequencing. *Genome research*. 19:1124-1132.
10. Purcell S, Neale B, Todd-Brown K, Thomas L, Ferreira MA, Bender D, et al. (2007): PLINK: a tool set for whole-genome association and population-based linkage analyses. *Am J Hum Genet*. 81:559-575.
11. Thiel G, Lietz M, Cramer M (1998): Biological activity and modular structure of RE-1-silencing transcription factor (REST), a repressor of neuronal genes. *The Journal of biological chemistry*. 273:26891-26899.
12. Ozisik G, Achermann JC, Meeks JJ, Jameson JL (2003): SF1 in the development of the adrenal gland and gonads. *Hormone research*. 59 Suppl 1:94-98.
13. Zhuang Y, Soriano P, Weintraub H (1994): The helix-loop-helix gene E2A is required for B cell formation. *Cell*. 79:875-884.
14. Bohrer C, Pfurr S, Mammadzada K, Schildge S, Plappert L, Hils M, et al. (2015): The balance of Id3 and E47 determines neural stem/precursor cell differentiation into astrocytes. *The EMBO journal*. 34:2804-2819.
15. Ohtani K, DeGregori J, Nevins JR (1995): Regulation of the cyclin E gene by transcription factor E2F1. *Proceedings of the National Academy of Sciences of the United States of America*. 92:12146-12150.
16. Phillips AC, Ernst MK, Bates S, Rice NR, Vousden KH (1999): E2F-1 potentiates cell death by blocking antiapoptotic signaling pathways. *Molecular cell*. 4:771-781.
17. Ginsberg D, Vairo G, Chittenden T, Xiao ZX, Xu G, Wydner KL, et al. (1994): E2F-4, a new member of the E2F transcription factor family, interacts with p107. *Genes & development*. 8:2665-2679.

18. Zhang Y, Chellappan SP (1995): Cloning and characterization of human DP2, a novel dimerization partner of E2F. *Oncogene*. 10:2085-2093.
19. Lomazzi M, Moroni MC, Jensen MR, Frittoli E, Helin K (2002): Suppression of the p53- or pRB-mediated G1 checkpoint is required for E2F-induced S-phase entry. *Nature genetics*. 31:190-194.
20. Kim J, Kim JD (2008): In vivo YY1 knockdown effects on genomic imprinting. *Human molecular genetics*. 17:391-401.
21. Sui G, Affar el B, Shi Y, Brignone C, Wall NR, Yin P, et al. (2004): Yin Yang 1 is a negative regulator of p53. *Cell*. 117:859-872.
